# Supplementary material for: Statistical Analysis of Contrail to Cirrus Evolution during the Contrail and Cirrus Experiments (CONCERT)
Source: Copernicus journal article supplement (doi:10.5194/acp-2017-946), 2017-10-13
Supplement: Supplementary file [file acp-2017-946-AC1-supplement.zip]

1 Statistical Analysis of Contrail to Cirrus Evolution during the Contrail and Cirrus Experiments  
2 (CONCERT)

3 Aurélien Chauvigné<sup>1</sup>, Olivier Jourdan<sup>1</sup>, Alfons Schwarzenboeck<sup>1</sup>, Christophe Gourbeyre<sup>1</sup>, Jean  
4 François Gayet<sup>1</sup>, Christiane Voigt<sup>2,3</sup>, Hans Schlager<sup>2</sup>, Stefan Kaufmann<sup>2</sup>, Stephan Borrmann<sup>3,4</sup>,  
5 Sergej Molleker<sup>3,4</sup>, Andreas Minikin<sup>2,5</sup>, Tina Jurkat<sup>2</sup>, Ulrich Schumann<sup>2</sup>

6 <sup>1</sup>Laboratoire de Météorologie Physique, UMR 6016 CNRS/Université Clermont Auvergne,  
7 Clermont-Ferrand, France.

8 <sup>2</sup>Institut für Physik der Atmosphäre, Deutsches Zentrum für Luft- und Raumfahrt (DLR),  
9 Oberpfaffenhofen, Germany.

10 <sup>3</sup>Institut für Physik der Atmosphäre, Universität Mainz, Mainz, Germany.

11 <sup>4</sup>Max-Planck-Institute for Chemistry, Department for Particle Chemistry, Mainz, Germany.

12 <sup>5</sup>Now at: Flugexperimente, Deutsches Zentrum für Luft- und Raumfahrt (DLR), Oberpfaffenhofen,  
13 Germany.

14 **Abstract:**

15 Air traffic affects the cloudiness, and thus the climate, by emitting exhaust gases and  
16 particles. The study of the evolution of contrail properties is very challenging due to the complex  
17 interplay of vortex dynamics and atmospheric environment (e.g. temperature, supersaturation).  
18 Despite substantial progress in recent years, the optical, microphysical, and macrophysical  
19 properties of contrails and ambient cirrus during contrail formation and subsequent ageing are still  
20 subject to large uncertainties due to instrumental and observational limitations and the large number  
21 of variables influencing the contrail life cycle. In this study, various contrail cases corresponding to  
22 different aircraft types and atmospheric conditions are investigated using a statistical method based  
23 on the in situ optical measurements performed during the CONCERT campaigns 2008 and 2011.  
24 These two aircraft campaigns encompass more than 17 aircraft contrail cases. A Principal  
25 Component Analysis (PCA) of the angular scattering coefficients measured by the Polar  
26 Nephelometer is implemented. The goal is to classify the sampled ice cloud measurements in 6  
27 clusters representative of different contrail development stages (primary wake, young contrail,  
28 contrail-cirrus and natural cirrus). Extinction and, asymmetry coefficients, nitrogen oxide  
29 concentrations, relative humidity with respect to ice (RHI) and particle size distributions are  
30 analysed for each cluster to characterize the evolution of ice-cloud properties during the contrail to  
31 cirrus evolution. The PCA demonstrates that contrail optical properties are well suited to identify  
32 and discriminate the different contrail growth stages and to characterize the evolution of contrail  
33 properties.

34 **1 Introduction**

35 Aircraft exhaust plumes have a significant impact on climate and tropospheric chemistry  
36 (Lee et al., 2010; IPCC, 1999). The Intergovernmental Panel for Climate Change IPCC special  
37 report on aviation (1999) estimates that NO<sub>x</sub> emissions from subsonic aircraft increase ozone  
38 concentrations at cruise level. Short and long lived pollution species have different impact on  
39 atmospheric chemical composition depending on the flight level (Frömming et al, 2012). Emissions  
40 of water vapour, black carbon (BC) / soot particles, sulphate (SO<sub>4</sub>) aerosols and nitrogen oxides  
41 (NO<sub>x</sub>) contribute to the modification of the chemical composition of the upper troposphere on  
42 shorter timescales (Lee et al., 2010, Gettelman and Chen, 2013; Liou et al., 2013). The long-term  
43 climate impact is mainly driven by CO<sub>2</sub> emissions. Modelling studies have shown that the direct

44 radiative forcing from aviation is expected to represent 3-4% (50-60 mW m<sup>-2</sup>) of the anthropogenic  
45 forcing (Lee et al., 2010; De Leon et al., 2012) and could reach 87 mW m<sup>-2</sup> in 2025 (Chen and  
46 Gettelman, 2016). Aircraft induced cloudiness has also an important impact on climate, although  
47 the quantitative assessment of the radiative forcing remains a major source of uncertainties (Lee et  
48 al., 2010).

#### 49 1.1. Contrail formation and evolution

50 Contrail formation is mainly controlled by the thermodynamic properties of the ambient air  
51 and by the aircraft emissions. The conditions for contrail formation can be determined by the  
52 Schmidt-Appleman Criterion (SAC) (Schumann, 1996). Contrail chemical composition can have a  
53 significant impact on the contrail formation (Kärcher et al., 2009). Indeed, the contrail  
54 microphysical properties, as the total number densities and ice crystal diameters, are directly linked  
55 to the emission index (e.g. soot emission index in kg-fuel<sup>-1</sup>). Several studies in the past have been  
56 dedicated to the evolution of concentrations of nitrogen oxide (NO) and sulphur dioxide (SO<sub>2</sub>) and  
57 their oxidized forms (Kärcher and Voigt, 2006 ; Voigt et al., 2006 ; Schäuble et al., 2009 ; Jurkat et  
58 al., 2011).

59 Two different processes of contrail formation have been studied: combustion condensation  
60 trails and aerodynamic condensation trails. Different studies (Gierens and Dilger, 2013; Jansen and  
61 Heymsfield, 2015) have illustrated characteristics of aerodynamically controlled contrail formation  
62 associated to warmer temperatures (observations at temperatures above -38°C). Contrails primarily  
63 initiated by the combustion processes result from the mixing of hot and humid exhaust gases with  
64 cooler and dryer ambient air. This increases the local relative humidity in the exhaust plume leading  
65 to the formation of contrails when the saturation with respect to liquid water is reached. In this case,  
66 soot and sulphate aerosols emitted by the aircraft (Moore et al., 2017) may act as condensation  
67 nuclei to form liquid droplets. Homogeneous ice nucleation of the liquid droplets can occur when  
68 the exhaust cools down through mixing with the ambient temperature, while preserving ice  
69 saturation. Small ice crystals are then formed in the jet phase within some tenths of a second  
70 (Kaercher and Yu, 2009).

71 The life-cycle of contrails depends on the interaction with the wake vortices behind aircraft  
72 and the ambient atmosphere (Irvine et al., 2012; Graf et al., 2012; Duda et al., 2013; Carleton et al.,  
73 2013; Schumann and Heymsfield, 2017). The ice crystals in the young contrails are captured within  
74 two counter-rotating wake vortices in the downwash behind the aircraft induced by the aircraft lift,  
75 which induce adiabatic compression, heating, and partial sublimation of the ice crystals within the  
76 primary wake (Lewellen and Lewellen, 2001; Sussmann and Gierens, 2001, Unterstrasser et al.,  
77 2008, Unterstrasser et al., 2016; Kärcher and Voigt, 2017). This primary wake may soon disappear  
78 if ambient air is subsaturated with respect to ice. In the case of supersaturation, the secondary wake  
79 becomes visible, thereby detraining ice particles from the primary wake at a higher level (Sussmann  
80 and Gierens, 1999, Kaufmann et al., 2014). Quasi spherical ice crystals become increasingly  
81 aspherical and grow by uptake of water vapour as long as saturation with respect to ice is  
82 prevailing. In ice saturated conditions, contrails can persist after the vortex breakdown, spread and  
83 evolve into contrail cirrus (Schumann and Heymsfield, 2017). The associated cloud cover (larger  
84 than for linear contrails alone) increases the radiative forcing of contrail cirrus (Burkhardt and  
85 Kärcher, 2011; Schumann et al., 2015).

#### 86 1.2. Optical and microphysical properties of contrail phases

87 The assessment of the contrail radiative forcing requires, in particular, an accurate  
88 estimation of the cloud cover, the visible optical depth, the single scattering characteristics, the ice

89 crystal effective size and habit (Yang et al., 2010; Spangenberg et al., 2013). Satellite observations  
90 provide a comprehensive dataset to study statistically the contrail to cirrus evolution. The combined  
91 contrail tracking algorithms on the Spinning Enhanced Visible and Infrared Imager (SEVIRI) on  
92 board the Meteosat Second Generation (MSG) satellites with properties inferred by the Moderate  
93 Imaging Spectroradiometer (MODIS) on board the Terra satellite was used by Vazquez-Navarro et  
94 al., (2015) to characterize the properties of 2300 contrails. Properties included lifetime (mean values  
95 of 1h), the length (130 km), the optical thickness (0.34), the altitude (11.7 km) and the radiative  
96 forcing ( $-26 \text{ W m}^{-2}$  for shortwave forcing over land) of these contrails.

97 However, detailed *in situ* optical and microphysical measurements are still needed to  
98 evaluate satellite products and to develop more appropriate retrieval algorithm. Discriminating  
99 contrails from natural cirrus from satellite observations remains extremely challenging. Although  
100 the optical and microphysical properties of young contrails (linear contrails) differ from natural  
101 cirrus properties, the contrail properties are highly time dependent and persistent contrail cirrus can  
102 be embedded in thin cirrus clouds. Recent *in situ* measurements (Voigt et al., 2017) show that the  
103 microphysical properties of contrail cirrus can still be distinguished from natural cirrus at contrail  
104 cirrus ages up to several hours.

105 Most of the studies (Jessberger et al., 2013; Lewellen et al., 2012 ; Schumann et al., 2013)  
106 separate the contrail analysis between the two wakes. Primary and secondary wake properties  
107 depend strongly on atmospheric conditions and aircraft type (emission index, vortex, flight level,  
108 ambient humidity, temperature, ...). In the primary wake, contrail ice crystals are quasi-spherical  
109 with values of the effective diameter ( $D_{\text{eff}}$ ) typically lower than  $4 \mu\text{m}$  (Schumann et al., 2011;  
110 Gayet et al., 2012; Järvinen et al., 2016; Schumann et al., 2017b). The total number concentration of  
111 ice particles is typically larger than  $1000 \text{ cm}^{-3}$  a few seconds after contrail formation (Baumgardner  
112 and Gandrud, 1998; Petzold et al., 1997). Then, it decreases by dilution to concentrations below  $200$   
113  $\text{cm}^{-3}$  within less than a minute after contrail generation (Poellot et al., 1999; Schröder et al., 2000;  
114 Gayet et al., 2012). Gayet et al. (2012) reported mean values of ice water content of  $3 \text{ mg m}^{-3}$  and  
115 maximum extinction coefficients close to  $7 \text{ km}^{-1}$ . In agreement with these results, the recent  
116 overview on contrail studies presented in Schumann et al. (2017b) reports several microphysical  
117 properties at different stages, for different atmospheric conditions as well as comparisons with the  
118 Contrail Cirrus Prediction (CoCIP) model simulations. Their study also highlights a large variability  
119 (which increases with contrail age) of contrail properties.

120 Several studies reported findings on the secondary wake and its evolution into contrail  
121 cirrus. Detained from the primary wake and submitted to saturated ambient air with respect to ice,  
122 ice crystals grow rapidly, while crystal concentration decreases. Within the first minutes after  
123 formation, measurements exhibit aspherical ice crystals characterized by effective sizes up to  $6 \mu\text{m}$ ,  
124 IWC ranging between  $2.5$  and  $10 \text{ mg m}^{-3}$ , extinction between  $2$  and  $3 \text{ km}^{-1}$ , with crystal  
125 concentrations typically lower than  $100 \text{ cm}^{-3}$  (Goodman et al., 1998; Voigt et al., 2010; Kübbeler et  
126 al., 2011; Gayet et al., 2012; Jeßberger et al., 2013; Schumann et al., 2013; Poellot et al., 1999;  
127 Febvre et al., 2009; Kaufmann et al., 2014). Aged contrails can persist and evolve into contrail  
128 cirrus if the ambient air is saturated with respect to ice, however those studies are limited by the  
129 lack of unambiguous identification (Schumann et al., 2017a).

130 After a few minutes, tracking contrails by visual navigation is challenging as contrail and  
131 contrail cirrus spread in the free troposphere. Observations of the ice crystal shape and growth over  
132 several tens of minutes and up to an hour illustrate that crystal effective size can easily reach  $20 \mu\text{m}$   
133 and beyond with number concentrations ranging from  $1$  to  $5 \text{ cm}^{-3}$  (Lawson et al., 1998; Schäuble et  
134 al., 2009), extinction less than  $0.5 \text{ km}^{-1}$  (Febvre et al., 2009), and IWC up to  $10 \text{ mg m}^{-3}$  (Schröder et  
135 al., 2000; De Leon et al., 2012). At this stage, within a sustained ice-supersaturated environment,

136 contrail microphysical properties may still differ from those of natural cirrus (Voigt et al., 2017)  
137 with concentrations of ice crystals larger than  $100 \mu\text{m}$  in the order of  $0.1 \text{ cm}^{-3}$ . These crystals  
138 typically show bullet rosette type habits (Heymsfield et al., 1998; Heymsfield et al., 2010). Optical  
139 depth values can reach values of 2.3 (Atlas and Wang, 2010), corresponding to an extinction of  
140  $0.023 \text{ km}^{-1}$ . Nevertheless, the transition from contrails to cirrus highly depends on the ambient  
141 saturation conditions. Modelling studies with typical atmospheric conditions show a temporal  
142 evolution of the optical and microphysical properties when contrails evolve to contrail cirrus clouds  
143 (Burkhardt and Kärcher, 2011; Unterstrasser et al., 2016 ; Schumann et al., 2015).

144 In this study, we report on a powerful alternative to classify cloud events into young  
145 contrail, contrail-cirrus and natural cirrus. The method is applied to aircraft data of the CONCERT  
146 (Contrail and Cirrus Experiment) campaigns (Voigt et al., 2010, 2011, 2014). The methodology  
147 consists in implementing a Principal Component Analysis (PCA) of the angular light scattering data  
148 measured by the Polar Nephelometer. The PCA patterns are classified to yield different cluster  
149 representing specific contrail types. Corresponding optical, microphysical, and chemical properties  
150 are derived for each contrail phase (from young contrails to cirrus contrails). This paper starts with  
151 an overview of the properties of contrails and cirrus clouds observed during two specific  
152 CONCERT flights (19 November 2008 and 16 September 2011) encompassing a series of different  
153 contrail evolution stages. These two flights containing a variety of contrail-cirrus information can  
154 be regarded as an analytical framework producing results which then can be compared to contrail-  
155 cirrus properties of other flights.

## 156 **2 CONCERT projects and data processing**

### 157 2.1 CONCERT campaigns

158 CONCERT-1 and CONCERT-2 campaigns took place in October/November 2008 and  
159 August/September 2011, respectively. These two campaigns with the DLR Falcon 20 E research  
160 aircraft were based in Oberpfaffenhofen, Germany, and sampled contrails and cirrus at mid-  
161 latitudes over Europe. The overall objective was to reduce uncertainties on the microphysical,  
162 chemical, and radiative properties of contrails behind aircraft of different types and to improve the  
163 evaluation of contrail's impact on climate. A few CONCERT flights were also dedicated to study  
164 emissions of Etna and Stromboli volcanos (Voigt et al., 2014; Shcherbakov et al., 2016). A few  
165 stratospheric intrusions were also observed during the flight missions. In total, 23 flights were  
166 recorded during the two measurement campaigns, wherein 12 flights were entirely focused on  
167 aircraft contrail chasing. Overall, more than 17 different aircraft exhausts plumes have been probed.  
168 CONCERT-2 campaign mainly focused on the observation of persistent contrails, and hence on the  
169 evolution of contrails to contrail cirrus.

170 During both CONCERT campaigns, the DLR research aircraft Falcon was equipped with a  
171 set of instruments to measure the optical and microphysical properties of cloud particles and also  
172 the trace gas composition in the UTLs (Upper Troposphere / Lower Stratosphere) region. Voigt et  
173 al. (2010) provide a detailed description of the aircraft instrumentation. We briefly introduce the  
174 instruments used in this study.

### 175 2.2 Aircraft instrumentation

176 The microphysical and optical particle properties of contrails and cirrus presented in this  
177 study were mainly derived from the PMS Forward Scattering Spectrometer Probe 300 (FSSP-300),  
178 the Polar Nephelometer (PN), and the PMS 2D-C hydrometeor imaging probe. The combination of

179 these independent techniques characterizes cloud particles within a range of diameters varying from  
180 0.5  $\mu\text{m}$  to 2 mm.

181 The PN (Gayet et al., 1997) measures the angular scattering coefficients (non-normalized  
182 scattering phase function) of an ensemble of water droplets or ice crystals or a mixture of those  
183 particles ranging from a few micrometers to approximately 1 mm in diameter. These particles  
184 intersect a collimated laser beam, at a wavelength of 804 nm, near the focal point of a parabolic  
185 mirror. The light scattered at angles from  $3.49^\circ$  to  $172.5^\circ$  is reflected onto a circular array of 56  
186 near-uniformly positioned photodiodes. In this study, reliable measurements were performed at 30  
187 scattering angles ranging from  $\pm 15^\circ$  to  $\pm 162^\circ$ . Particle phase (water droplets and/or ice crystals) can  
188 be assessed as well as single scattering properties such as the extinction coefficient and the  
189 asymmetry coefficient with uncertainties of 25% and 4%, respectively (Gayet et al., 2002; Jourdan  
190 et al., 2010).

191 Particle size distributions and corresponding microphysical and optical integrated properties  
192 (IWC, Deff, N, and extinction) were derived from both FSSP-300 and 2DC measurements. The  
193 FSSP-300 (Baumgardner et al., 1992) measures the intensity of forward scattered light from cloud  
194 particles passing through the laser beam, with cloud particles in the diameter range 0.35-20  $\mu\text{m}$ . In  
195 the forward angular region (from  $4^\circ$  to  $12^\circ$ ), scattering is mainly described by the particle  
196 diffraction pattern and therefore depends on the refractive index, the shape, and the size of the  
197 particles. The method of data processing and size calibration used during the CONCERT campaigns  
198 have been presented in Gayet et al. (2012). We briefly recall that the asymmetry parameter derived  
199 from the PN was used to discriminate nearly spherical particles ( $g \geq 0.85$ ) from non-spherical ones  
200 ( $g < 0.85$ ) at 804 nm. For spherical ice particles, Mie calculations were used to derive the size bin  
201 limits and the corresponding extinction efficiency. Results were adjusted to the calibrated probe  
202 response. Additionally, to minimize Mie ambiguities related to the FSSP-300 size response, 31  
203 channels were rebinned to 13 channels with a diameter ranging from 0.5  $\mu\text{m}$  to 18  $\mu\text{m}$  (upper  
204 channels 30 and 31 were excluded from the data analysis). For non-spherical particles, the size of  
205 the contrail particles is expressed in terms of an equivalent surface or area diameter, i.e. the  
206 diameter of a sphere that has the same area than the projected area of the measured non- spherical  
207 particle image (Mishchenko et al., 1997; Schumann et al., 2011). The particles were assumed to be  
208 rotationally symmetric ice ellipsoids with an aspect ratio of 0.5. Accordingly, and contrary to the  
209 method used for spherical particles, 15 size bins ranging from 0.5  $\mu\text{m}$  to 18  $\mu\text{m}$  were defined based  
210 on T-Matrix calculations following Borrmann et al., (2000).

211 The bi-dimensional optical array spectrometer probe (2DC) provides information on the  
212 crystal size and shape within a nominal size range from 25  $\mu\text{m}$  to 800  $\mu\text{m}$  by recording cloud  
213 particles shadow images with a 25  $\mu\text{m}$  resolution. The method of data processing used in this study  
214 is described in detail in Gayet et al. (2002) and Febvre et al. (2009). Reconstruction of truncated  
215 particles has been considered for the PSD calculations and the sampling surfaces have been derived  
216 according to Heymsfield and Parrish (1978). To improve the statistical significance of low particle  
217 concentrations, a 5-s running mean was applied. As the sensitivity of the probe to small particles  
218 decreases with airspeed (Lawson et al., 2006), particles smaller than 100  $\mu\text{m}$  may not be detectable  
219 at the Falcon airspeed of typically 180  $\text{m s}^{-1}$ . This may result in larger uncertainties of up to 100%  
220 in the derived microphysical parameters such as the IWC (Gayet et al., 2002 and 2004).

221 For spherical and non-spherical particles, the extinction coefficients are calculated from the  
222 following equation:

$$Ext = \frac{\pi}{4} \sum_i \beta_{ext}^i N_i D_i^2 \quad (1)$$

223 where  $\beta_{ext}^i$  is the extinction efficiency (values depend on spherical or aspherical particle  
224 characterization),  $D_i$  the mean diameter in channel  $i$ , and  $N_i$  the number concentration.

225 Different approaches are used to retrieve ice water content from spherical and non-spherical  
226 particles (Garret et al., 2003 ; Gayet et al., 2004 ; Gayet et al., 2012). For spherical particles (gPN >  
227 0.85), IWC is computed from the following equation:

$$IWC_{spherical} = \frac{\pi}{6} \rho_{ice} \sum_i N_i D_i^3 \quad (2)$$

228 with  $\rho_{ice}$  the bulk ice density ( $0.917 \text{ g cm}^{-3}$ ).

229 For non-spherical ice crystals (gPN < 0.85 and for particle diameters larger than  $70 \mu\text{m}$ ), an  
230 equivalent diameter method is used (Gayet et al., 2004). For an ice crystal with an area  $A$ , the  
231 particle equivalent diameter  $D_{equ}$  (in mm for eq. (3) and (4)), the equivalent mass  $x_{equ}$  (in mg), and  
232 the Ice Water Content (IWC in  $\text{mg m}^{-3}$ ) are defined as:

$$A \leq 0.049 \text{ mm}^2 \quad D_{equ} = 0.82A^{0.48} \quad (3)$$

$$A > 0.049 \text{ mm}^2 \quad D_{equ} = 0.56A^{0.32} \quad (4)$$

$$x_{equ} = \frac{\pi}{6} \rho_{water} D_{equ}^3 \quad (5)$$

$$IWC_{non-spherical} = \sum_i N_i x_{equ} \quad (6)$$

234 with  $\rho_{water}$  the bulk water density ( $1 \text{ g cm}^{-3}$ ).

235 These equations do not account for possible shattering of large ice crystals on the probe  
236 inlets. This effect is minimized in young contrails but can lead to an overestimation of small ice  
237 crystal concentration in contrail cirrus clouds.

238 Trace gas measurements were also performed. NO/NO<sub>y</sub> concentrations can be significant in  
239 young tropospheric aircraft plumes. NO and NO<sub>y</sub> mixing ratio were performed using the  
240 chemiluminescence technique (Schlager et al., 1997) with a time resolution of 1 s. Instruments used  
241 for CONCERT campaigns are described in several studies (Jurkat et al., 2010 ; Jurkat et al., 2011 ;  
242 Voigt et al., 2014 ; Jurkat et al., 2016). The accuracy (and precision) of the NO and NO<sub>y</sub>  
243 measurements are estimated with 7% (and 10%) and 10% (and 15%), respectively (Ziereis et al.,  
244 2000).

245 Relative humidity with respect to ice (RHI) is also key parameter to understand contrail  
246 formation and microphysical properties. Water vapour was measured with the chemical ionization  
247 mass spectrometer AIMS-H<sub>2</sub>O during CONCERT-2 (Kaufmann et al., 2014; 2016). Hygrometers  
248 using the Lyman- $\alpha$  technique (FISH, Zöger et al., 1999; Meyer et al., 2015), and frost point  
249 hygrometers (CR-2, Heller et al., 2017) were deployed on the Falcon during CONCERT-1 and 2.

## 250 3 Results

### 251 3.1 Overview of the cloud properties sampled during the reference cases

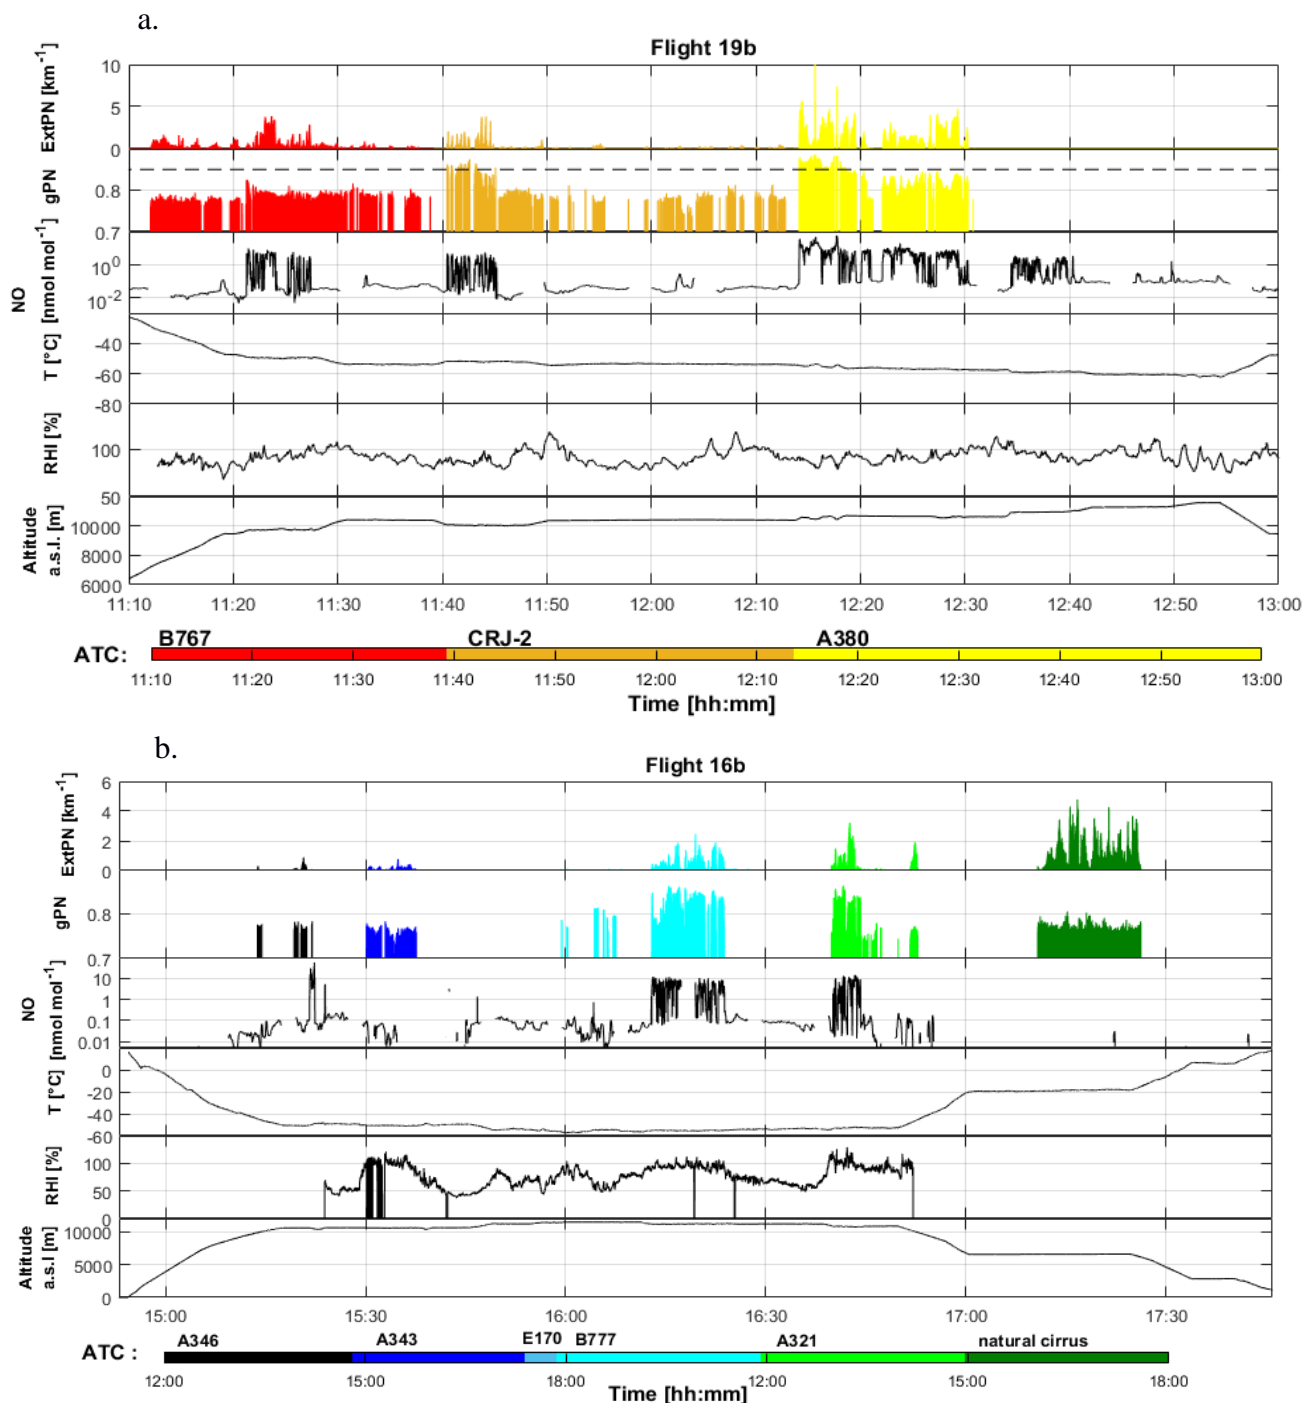

Figure 1: Time series at 1 s resolution for flights a) 19b (CONCERT 1) and b) 16b (CONCERT 2). From top to bottom: extinction coefficient (in  $\text{km}^{-1}$ ) and asymmetry parameter measured by the Polar nephelometer at 804 nm (dashed line corresponds to a 0.85 value), concentration of nitric oxide (in  $\text{nmol mol}^{-1}$ ) measured by chemiluminescence technique, temperature (in  $^{\circ}\text{C}$ ), relative humidity with respect to ice (in %), and altitude a.s.l. (in m). Temporal series are coloured according to time and aircraft chasing information from Air Traffic Control (ATC).

252 The purpose of this section is to give an overview of the contrail optical properties and more  
 253 interestingly to evaluate the ability of the Polar Nephelometer measurements to identify contrails.  
 254 Two flights, performed on 16 September 2011 during CONCERT-2 (flight 16b) and on 19  
 255 November 2008 during CONCERT-1 (flight 19b), respectively, were selected for their variety of  
 256 contrails and cirrus sampled during these two flights. The two flights are considered as a benchmark  
 257 to illustrate the potential of the PCA methodology described in Sect. 3.2.

258 Figure 1 displays the time series of the extinction coefficient (ExtPN) and the asymmetry  
259 parameter (gPN) at a wavelength of 804 nm, relative humidity with respect to ice (RHI), the nitric  
260 oxide (NO) concentration, the temperature T and the altitude for flights 19b and 16b. RHI measured  
261 with the AIMS mass spectrometer is shown for flight 16b. RHI measurements during flight 19b as  
262 well as instrument shortcomings are discussed in details in Kübbeler et al. (2011), Gayet et al.  
263 (2012), Jessberger et al. (2013) and Schumann et al. (2013). For both flights, Air Traffic Control  
264 (ATC) provides information on the flight tracks and on the chased aircraft (aircraft type, engine  
265 type, fuel flow, weight, engine power setting). From this information the Falcon measurements  
266 were attributed to the exhaust plume of individual aircraft with an estimated plume age. Time series  
267 are colour coded according to ATC information.

268 The PN extinction coefficient coupled with the asymmetry parameter seems to be a  
269 reasonable proxy to detect contrails and cirrus clouds (see amongst other references, Voigt et al.,  
270 2010). ExtPN values, by definition, depend on the cloud particle concentration and size. Values  
271 typically beyond  $0.1 \text{ km}^{-1}$  correspond to cloud events that are well correlated to environmental  
272 conditions supersaturated with respect to ice ( $\text{RHI} > 100\%$ ). Figure 1 shows that relatively high  
273 values of extinction can be found in flights 19b and 16b that are linked to the presence of contrails  
274 or cirrus clouds. Moreover, the temporal distributions of these values are in accordance with ATC  
275 information for both flights. For instance, most of the contrails induced by commercial aircraft  
276 exhaust plumes are associated with significant extinction coefficient values. The ExtPN values are  
277 between  $0.2 \text{ km}^{-1}$  and  $10 \text{ km}^{-1}$  for contrails induced by A346, A340, and A380 commercial aircraft.  
278 Cirrus clouds are detected with more variable extinction values mostly larger than  $0.5 \text{ km}^{-1}$ . Most of  
279 the aircraft induced contrails are detected by the PN except for the ones stemming from the E170  
280 airplane. At 15:50 during flight 16b, ATC identified the E170 position close to the Falcon flight  
281 trajectory, however the ExtPN and the NO mixing ratio remained very low. Hence, the E170  
282 contrail was not probed by the Falcon. In the following we assume that only periods with ExtPN  
283 values above  $0.1 \text{ km}^{-1}$  are considered as a reliable signature of contrails.

284 The absolute values of the asymmetry parameter gPN provide additional information on the  
285 cloud particle shape. Indeed, gPN is a good indicator of the degree of sphericity of ice crystals  
286 (Gayet et al., 2012). Ice clouds with gPN values higher or equal to 0.85 are typically composed of  
287 spherical ice crystals, whereas lower values are indicative of aspherical ice particles. In a  
288 supersaturated environment, crystals grow by water vapour deposition and become increasingly  
289 aspherical with time. However, in very young contrails, spherical ice crystals with an asymmetry  
290 coefficient around 0.85 prevail. gPN is decreasing when water vapour diffusion is generating more  
291 and more aspherical crystal shapes at ice supersaturation. This can be observed for A321 chasing  
292 during flight 16b where gPN is decreasing to a value of 0.75 whilst RHI remains around 100%. This  
293 is not the case during B777 chasing where no gPN decrease is observed when  $\text{RHI} < 100\%$ .  
294 However, it is important to note that the RHI measurements during the CRJ-2 chasing events do not  
295 show supersaturated conditions, whereas contrail seems persistent. Indeed, RHI measurements  
296 should be discussed carefully for this campaign due to calibration issues.

297 Natural cirrus clouds are mainly composed of non-spherical ice crystals. These clouds can  
298 be easily discriminated from young contrails as they exhibit a much lower asymmetry parameter  
299 typically below 0.75 (see amongst others Jourdan et al., 2003b, Febvre et al., 2009). However, no  
300 accurate ambient RHI data can be retrieved for measurements in natural cirrus due to instrumental  
301 calibration problems. A good example of the evolution of gPN is the CRJ-2 contrail observed  
302 between 11:40 and 11:45 during flight 19b. The sequence illustrates the potential of the gPN  
303 measurement to characterize the evolution of contrail properties. The evolution of the ice crystal  
304 shape is reflected in the decrease of the asymmetry parameter from 0.88 to 0.79 (uncertainties  
305 around 0.04) after only 5 min and down to 0.77 after 20 min. A weaker decrease of gPN values



306 (around  $0.78 \pm 0.02$ ) is then observed until 12:10 corresponding to 30 min of contrail ageing.  
307 During this period, ice crystals are expected to grow by water vapour diffusion. A similar decrease  
308 of gPN values has been reported by Gayet et al. (2012) in the ageing contrail from an A380 aircraft,  
309 and is also visible in the present study for the B767 and the A321 contrails.

310 NO concentration measurements can also be used to discriminate natural cirrus clouds from  
311 ice clouds influenced by aircraft traffic. At the typical altitude of 10 km, NO environmental  
312 concentrations are close to background values. In contrast, NO concentrations in young contrails  
313 may reach several tens of  $\text{nmol mol}^{-1}$  (Voigt et al., 2010). Figure 1 shows a good correlation  
314 between the expected localization of young contrails and NO concentrations. The dilution effect in  
315 the upper troposphere causes an important decay of chemical concentrations. For instance, the first  
316 few seconds of the A380 chasing during flight 19b are characterized by a high NO concentration  
317 (up to  $40 \text{ nmol mol}^{-1}$ ) followed by a fast decrease to  $10 \text{ nmol mol}^{-1}$  in the next 15 min, and less than  
318  $5 \text{ nmol mol}^{-1}$  beyond 15 min. NO concentrations finally decrease to background levels within hours  
319 (e.g. Voigt et al., 2017). This decrease of the NO concentration is in accordance with the decrease  
320 of the extinction coefficient (from 10 to  $0.2 \text{ km}^{-1}$ ) and asymmetry parameter (from 0.88 to 0.77).  
321 NO is mainly used as an additional contrail indicator. However, during some aircraft chasing  
322 events, NO concentrations were near background levels, while mass spectrometric measurements  
323 (not shown here) indicate elevated concentrations of HONO,  $\text{HNO}_3$ , and  $\text{SO}_2$  representative for  
324 contrail chemical species.

325 Flights 19b and 16b clearly show that the optical properties of contrail clouds (supported by  
326 the ATC information) in conjunction with specific trace gas concentration measurements can be  
327 used to discriminate contrails from natural ice cloud events. A first order analysis of these  
328 parameters can be used to roughly distinguish young contrails (mostly quasi-spherical ice crystals)  
329 from aged contrails (mostly aspherical ice crystals) and natural cirrus (background NO  
330 concentrations). This analysis is mainly qualitative and based solely on a few typical parameters  
331 (Fig. 1). A more robust statistical method should be used to accurately separate the different  
332 contrail phases from natural cirrus. In the following section, relationships between contrail and ice  
333 cloud properties scattering properties are investigated more extensively to assess whether the  
334 information content of the PN scattering measurements is sufficient to document changes in the  
335 contrail microphysical properties.

## 336 **3.2 Statistical Method**

337 In this section, we present a methodology based on the statistical analysis of the optical  
338 signature of contrails and cirrus. The goal is to classify the contrail properties according to the  
339 aircraft origin and evolution stage. The main objective of the Principal Component Analysis (PCA)  
340 is data reduction to allow a better physical interpretation of the light scattering patterns derived  
341 from the Polar Nephelometer measurements (Legendre and Legendre, 1998; Jourdan et al., 2003).  
342 In this study, optical properties of ice crystals in the evolving contrail environment are examined to  
343 evaluate contrail evolution. This statistical analysis was already successfully applied to discriminate  
344 mixed phase clouds (Jourdan et al., 2003 ; Jourdan et al., 2010) from liquid clouds and ice clouds,  
345 and to identify porous aerosol in degassing plumes (Shcherbakov et al., 2016).

### 346 **3.2.1 Reference definition**

347 The PCA is first applied to the PN angular scattering coefficients measurements performed  
348 during flights 16b and 19b which are here considered as our reference dataset. Initially, a  
349 correlation matrix is calculated to characterize the link between each scattering angle. The PCA is

350 designed to generate a new limited set of uncorrelated parameters, called principal components  $C_{lj}$   
 351 representative of the original data set variability.

352 A first implementation of the PCA is performed to detect unreliable data or out of order  
 353 photodiodes. For instance, seven photodiodes presented a low signal to noise ratio and were  
 354 excluded from the dataset. Flight sequences characterized by  $\text{ExtPN} < 0.1$  were also removed.  
 355 Finally, flight sequences dedicated to aircraft chasing and ice cloud sampling were considered to  
 356 perform a second PCA. The analysis is performed on the remaining angular scattering coefficients  
 357 (4669 Angular Scattering Coefficients (ASC) representing PN measurements of flights 16b and  
 358 19b) restricted to 25 angles  $\theta$  ranging from  $15^\circ$  to  $155^\circ$ . The new set of variables or coordinates,  
 359  $C_{lj}$ , can be expressed with the scalar product of the vector of reduced angular scattering  
 360 coefficients  $\overrightarrow{\sigma}_j(\theta)$  for the  $j^{\text{th}}$  measurements, expressed in log scale, and the  $l^{\text{th}}$  eigenvector  $\xi_l(\theta)$  (i.e.  
 361 principal component) of the total data set correlation matrix (Jourdan et al., 2010).

$$C_{lj} = (\overrightarrow{\ln\sigma_j} - \langle \overrightarrow{\ln\sigma} \rangle)^T \cdot \overrightarrow{\xi_l} \quad (4)$$

362 where  $\langle \overrightarrow{\ln\sigma} \rangle$  represents the average ASC of the dataset.

363 The first three eigenvectors  $\overrightarrow{\xi_l(\theta)}$  of the correlation matrix are displayed in Fig. 2 along with  
 364 their normalized eigenvalues  $\lambda_l$ , representing more than 99% of the variability of the PN angular  
 365 scattering coefficients (ASC).

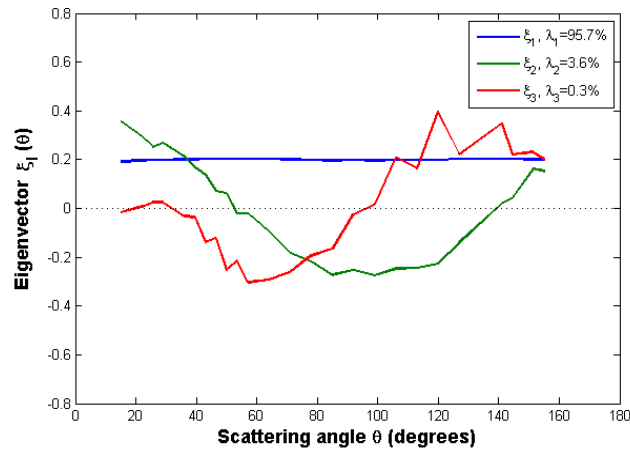

Figure 2: First three eigenvectors for the flights 16b and 19b.

366 The first eigenvector  $\xi_1(\theta)$  is approximately constant versus scattering angle and represents  
 367 95.7% of the total variance. It means that this principal component is representative of changes of  
 368 the magnitude of phase functions without any changes in their global shape. This behaviour means  
 369 that 95.7% of the ASC variations are linked to changes of the cloud particle extinction. Results  
 370 show a good correlation ( $r^2 = 0.98$ ) between the first eigenvector and the extinction derived from the  
 371 PN measurements (ExtPN).

372 The second eigenvector  $\xi_2(\theta)$  reverses sign twice at scattering angles equal to  $50^\circ$  and  $140^\circ$   
 373 with an extremum around  $90^\circ$ . Accordingly, 3.6% of the angular scattering variability corresponds  
 374 to a redistribution of scattered energy from the angular region ( $50^\circ$ - $140^\circ$ ) to scattering angles lower  
 375 than  $50^\circ$  and higher than  $140^\circ$ . Light-scattering modelling studies demonstrate that the scattering  
 376 behaviour in the angular region between  $60^\circ$  and  $140^\circ$  is sensitive to the particle shape and

377 thermodynamic phase (Jourdan et al., 2010). A strong linear correlation ( $r^2=0.97$ ) between the  
 378 second eigenvector and the asymmetry coefficient (gPN) at 804 nm is found.

379 The third eigenvector represents only 0.3% of the total variance. However, this eigenvector  
 380 provides additional information in scattering regions which are not well described by the first two  
 381 principal components. It has opposite signs in the angular region ( $30^\circ$ - $90^\circ$ ) and ( $90^\circ$ - $155^\circ$ ) with  
 382 maximum extremal values at  $60^\circ$  and  $120^\circ$ . The shape of the third eigenvector describes the  
 383 forward/backward hemisphere partitioning of the scattering. Baran et al. (2012), Xie et al. (2006),  
 384 and Xie et al. (2009) showed that the scatter pattern for angles between  $120^\circ$  and  $160^\circ$ ,  
 385 corresponding to ice bow-like effects, is sensitive to quasi-spherical particles. Moreover, these  
 386 backscattering angles ( $\theta > 120^\circ$ ) and scattering angles around  $22^\circ$  and  $46^\circ$  (corresponding to halo  
 387 features) can also be linked to the particle habits and surface roughness (Xie et al., 2009, Jourdan et  
 388 al., 2010).

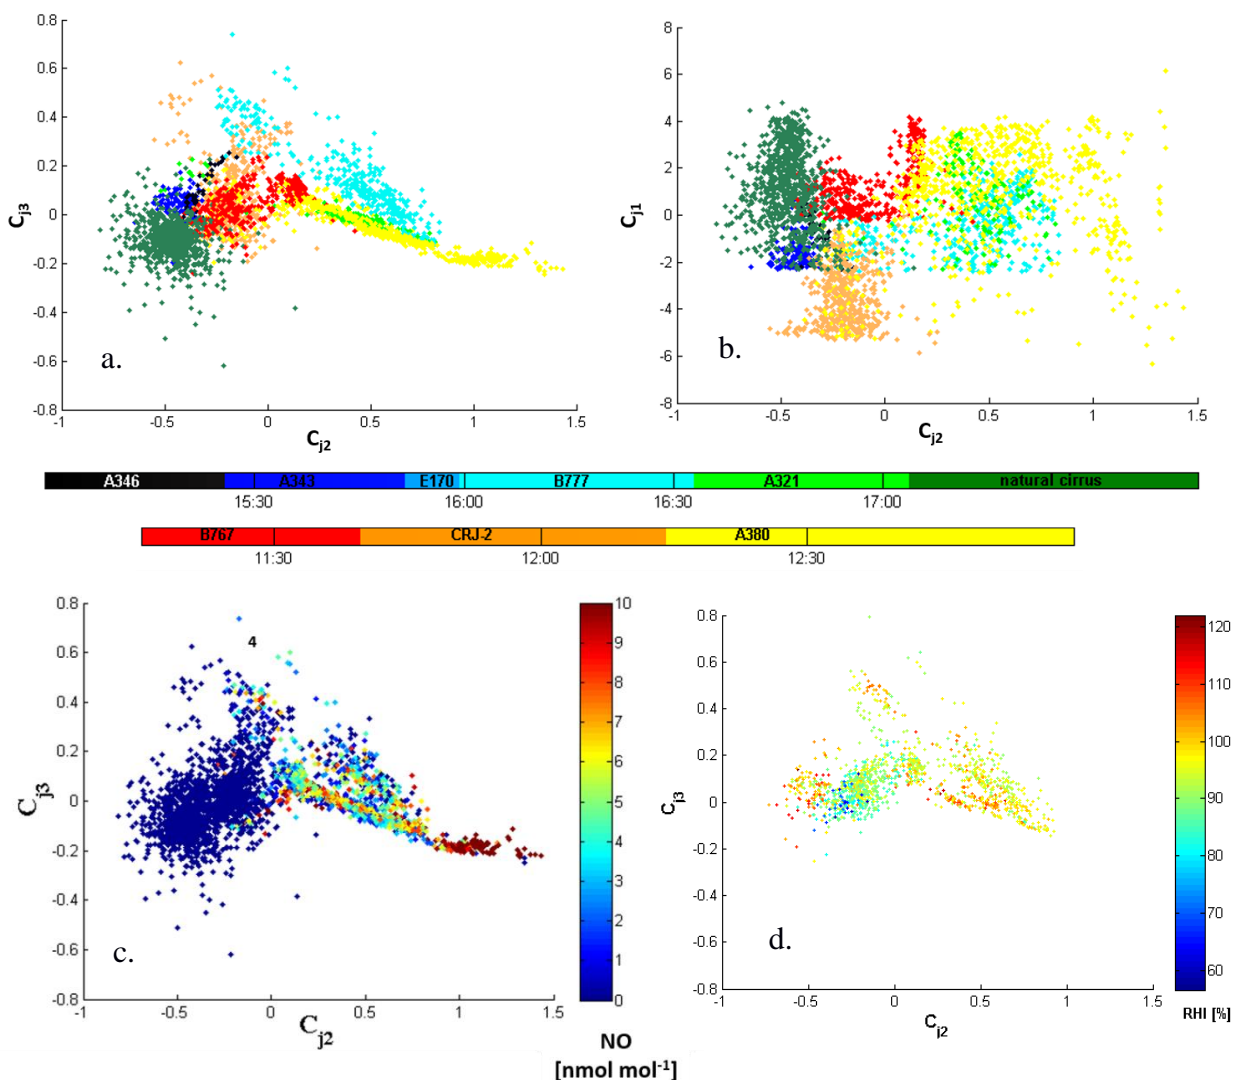

Figure 3: Expansion coefficient diagram for flights 16b and 19b: third versus second principal component for a), c) and d), and first versus second principal component for b). Data points are colour coded according to ATC information for a) and b), by NO concentration for c), and by RHI values for d).

389 Each phase function (or ASC) measured by the PN can be expressed with a good accuracy  
 390 as a linear combination of the three principal components (Jourdan et al., 2010). The PN data are  
 391 projected into a new space defined by the three principal components (3D-space) instead of the 25-  
 392 dimensional space of ASC. The scatterplots of the  $C_{j3}$  and  $C_{j1}$  expansion coefficients versus the  $C_{j2}$

393 coefficient are represented on Fig. 3a and b respectively. Fig. 3a illustrates the features of the ASC  
394 measurements in one of the most comprehensive way. Each point corresponds to a measured phase  
395 function documented over 25 angles. The variability of  $C_{j2}$  coefficients is significant with values  
396 ranging from -1 to 1.5. The angular variation of the second principal component indicates that large  
397 values of  $C_{j2}$  ( $C_{j2} > 0.75$ ) correspond to ASC with low side scattering ( $60^\circ$ - $130^\circ$ ) and higher forward  
398 scattering ( $15^\circ$ - $40^\circ$ ) and somehow higher backscattering ( $145^\circ$ - $155^\circ$ ). This behaviour is connected to  
399 an increase of the asymmetry parameter with an increase of  $C_{j2}$  values. Thus, the fraction of  
400 spherical particles increases with increasing  $C_{j2}$ . In the region defined by negative values of  $C_{j2}$  the  
401 density of points is relatively high. These cloud events exhibit optical properties characterized by a  
402 large side scattering and low asymmetry parameter. Therefore, specific cloud sequences sharing  
403 similar scattering properties can be identified based on this second principal component. Young  
404 contrails characterized by quasi-spherical ice crystals have high positive values of  $C_{j2}$  while cirrus  
405 clouds and contrail cirrus exhibit high negative values.

406 In the space of the third principal component high positive values of  $C_{j3}$  imply that less  
407 energy is scattering in the forward hemisphere and thus more energy is scattered in the backward  
408 hemisphere. The variability of the expansion coefficients is less pronounced as ASC are distributed  
409 between -0.4 and 0.6. Most of the measured ASC do not significantly differ from the average ASC  
410 in the angular ranges ( $30^\circ$ - $90^\circ$ ) and ( $90^\circ$ - $155^\circ$ ). However, some specific clusters linked to scattering  
411 behaviour can be identified for values of  $C_{j3}$  greater than 0.1 and lower than -0.1. These threshold  
412 values also depend of the position of the ASC on the second principal component. Finally, the first  
413 principal component is directly linked to the extinction coefficient. High values of  $C_{j1}$  are  
414 representative of optically dense cloud sequences.

415 Figure 3c shows an increase of  $C_{j2}$  for increasing NO mixing ratio. This clearly indicates  
416 that the contrails are evolving in space and/or time along the Falcon flight track. Cloud regions  
417 influenced by air traffic can be discriminated from clouds formed by natural processes based on the  
418 NO concentration values. Hence, contrails characterized by a low side scattering due to the presence  
419 of spherical ice crystals correspond to high NO concentration. This behaviour can be a signature of  
420 young contrail properties. Elder or aged contrails composed of a higher fraction of non-spherical  
421 crystals or growing more aspherically are expected to exhibit an enhanced side scattering and a  
422 lower asymmetry parameter associated to lower NO concentrations. RHI measurements also give  
423 relevant information on the capacity of the cloud to be persistent. Thus, Fig. 3d shows higher RHI  
424 values with decreasing gPN values.

### 425 **3.2.2 Clustering analyses**

426 The new representation of each measurement in the space of the first three principal  
427 component reveals different clusters, characteristic of specific scattering behaviour. The clustering  
428 k-mean method (Seber 1984, Spath 1985) is applied to the reference dataset (flights 19b and 16b) to  
429 partition the observations into k clusters to minimize the variance within each cluster (i.e. to  
430 minimize the distance between each data point and the centre of the cluster it belongs to). The  
431 number of cluster k is an adjustable parameter. Then in a first step, each observation is assigned to a  
432 specific cluster whose mean has the least squared Euclidean distance (i.e. nearest mean). In a  
433 second step, the position of each cluster is set to the mean of all data points belonging to that cluster  
434 (i.e. the centroids of each of the k clusters becomes the new means). These two steps are repeated  
435 until convergence is reached when the assignments no longer change.

436 16 clusters were found to encompass all points of the two flights and to partition each  
437 aircraft chasings identified from ATC information (Fig. 3a and 3b). For clarity and better  
438 understanding of the variability of contrail properties, we choose to limit the number of clusters to

439 6. 9 clusters are merged into 2 clusters to define the group “natural-cirrus” and B767 / A343 / CRJ-  
 440 2 contrails (referred hereafter to Cluster 3 and 5 respectively). 4 clusters are also gathered in one  
 441 new cluster corresponding to A321 / A380 contrails (referred to Cluster 2 hereafter). In addition,  
 442 only data within the 10% of the maximum Mahalanobis distance (De Maesschalck et al., 2000) to  
 443 the respective cluster’s centre has been considered for this analysis.

444 Clusters are defined by their means (or centres), standard deviations (or widths), and cross-  
 445 correlations (or tilts). The Mahalanobis distance is given by the equation:

$$D_M(x)_i = \sqrt{(x - \mu_i)^T S_i^{-1} (x - \mu_i)} \quad (5)$$

446 with  $D_M$  the Mahalanobis distance between point  $x$  and the  $i^{\text{th}}$  cluster center,  $\mu_i$  the N-dimensional  
 447 mean of this cluster and  $S_i$  its covariance matrix.

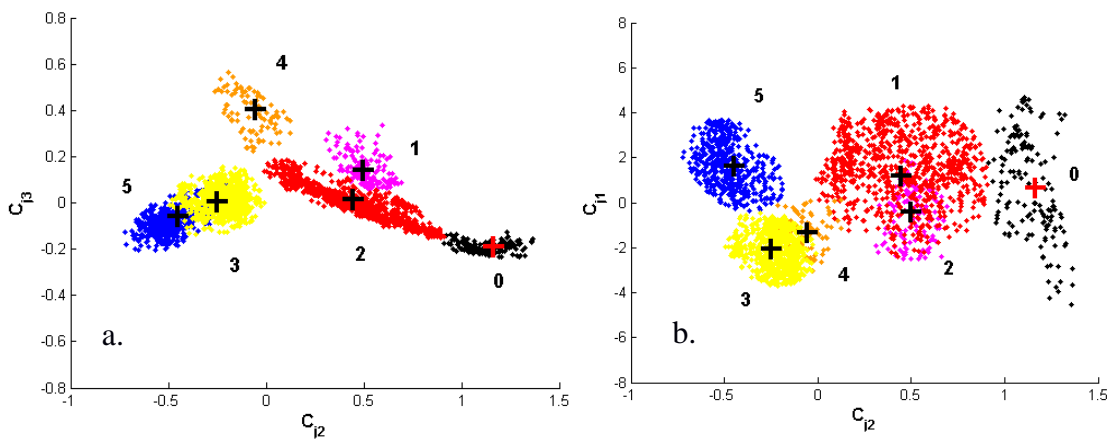

Figure 4: Clustering results of the k-mean method applied to the base (flights 16b and 19b). Third versus second principal component for a), and first versus second principal component for b). Only data within the 10% of the maximum Mahalanobis distance to the respective cluster’s centers have been considered for this analyse.

448 Figure 4 shows the partitioning of the dataset into the 6 new clusters (clusters 0 to 5). In the  
 449 following we use data from chemical tracers and optical measurements, and aircraft type  
 450 information to support and discuss the results of the k-means clustering method.

451 While clusters 3 and 5 are characterized by very low NO concentrations (close to zero, Fig.  
 452 3c) above background, clusters 0, 1, 2, and 4 correspond to higher concentrations representative of a  
 453 significant aircraft exhaust influence. ATC information shows that cirrus clouds are gathered in  
 454 cluster 5. Most of the contrails induced by the B767, A343, A346 and CRJ2 aircraft are associated  
 455 to cluster 3 or 5. These cloud events share similar optical properties characterized by a low  
 456 asymmetry parameter, high side scattering behaviour, and supersaturated ambient conditions with  
 457 respect to ice for some cases. Contrails relative to the A380 aircraft are dispatched in cluster 0 and 2  
 458 while the ones corresponding to the B777 are spread out between clusters 1 and 4.

459 The contrail and cirrus classification based on ASC measurements appears to be consistent  
 460 with the independent trace gas measurements. Each cluster represented on Fig. 4 can be linked to a  
 461 distinct cloud event. Therefore, the combination of flights 16b and 19b can provide a relevant test-  
 462 bed database to discriminate contrail properties. Young contrails (spherical ice crystals) are  
 463 associated to clusters 0, 1 or 2, whereas aged contrails (aspherical ice crystals and high RHI values)  
 464 with more pristine ice are categorized in clusters 3 and 4, and finally natural cirrus (low NO  
 465 concentrations) are found in cluster 5. A less precise analysis (using onboard camera) reveals that

466 cluster 0 corresponds essentially to the primary wake created below the secondary wake behind an  
 467 aircraft. Table 1 summarizes these cluster's definitions and names used in this work.

468

| Cluster number | definition       | name       |
|----------------|------------------|------------|
| 0              | Primary Wake     | <b>PW</b>  |
| 1              | Young Contrail 1 | <b>YC1</b> |
| 2              | Young Contrail 2 | <b>YC2</b> |
| 3              | Aged Contrail 1  | <b>AC1</b> |
| 4              | Aged Contrail 2  | <b>AC2</b> |
| 5              | Cirrus Cloud     | <b>CC</b>  |

Table 1: Cluster's definitions according to ATC information and tracer measurements (NO concentrations and RHI values)

469 One should keep in mind that some points are still arbitrarily attributed to a particular cluster  
 470 without strong physical justification.

### 471 3.2.3 Merging other CONCERT flights

472 In this section we complement the previous analysis with additional cloud optical  
 473 measurements performed during other CONCERT flights to increase the robustness of the method.

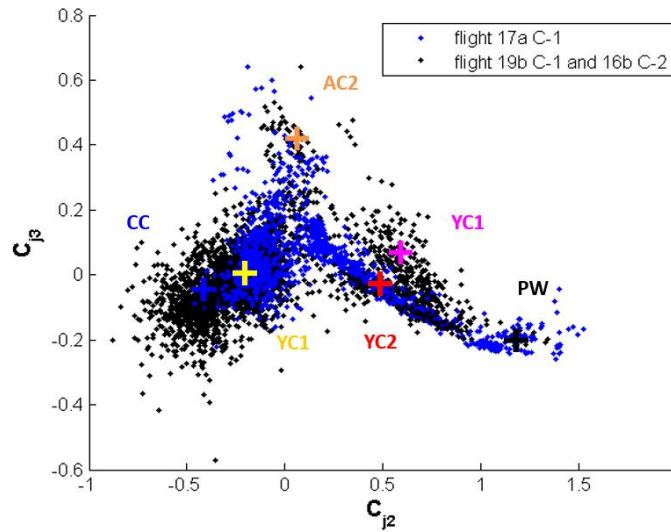

Figure 5: Example of data projection in the  $C_{j2}/C_{j3}$  space where data from flight 17a (blue data points) are superposed on the data from the benchmark flights 19b and 16b (black data points).

474 The ASC measured during other flights can be projected in the space of the principal  
 475 components established with flights 16b and 19b dataset. The coordinates of the data points  
 476 corresponding to the other flights are calculated from Eq. (4). An example of this data projection is  
 477 illustrated in Fig. 5 where flight 17a is represented in the  $C_{j2}/C_{j3}$  space. Each data point can be  
 478 attributed to one cluster previously defined by the k-mean clustering method based on flights 16b  
 479 and 19b dataset (black points). In other words, the ASC measured during another flight can be  
 480 merged (projected) into the expansion coefficient diagram displayed on Fig. 3. Data points sharing  
 481 similar optical properties will be close to each other on such plot. Figure 5 shows that different  
 482 contrail phases are observed during flight 17a. Data points are mostly grouped into cluster AC1, but

483 are also present in clusters AC2, YC2, and PW. Finally, cloud data gathered during this flight are  
 484 mainly categorized as young and aged contrails. We follow this methodology to project and classify  
 485 each additional “contrail” event performed during both CONCERT campaigns with minimum  
 486 Mahalanobis distance (see Eq. (5)).

|                |                      | Cluster                  |                 |                |     |     |        | Number of points | Age (s)   |
|----------------|----------------------|--------------------------|-----------------|----------------|-----|-----|--------|------------------|-----------|
|                |                      | PW                       | YC1             | YC2            | AC1 | AC2 | CC     |                  |           |
|                |                      | 1st wake                 | young contrails | aged contrails |     |     | Cirrus |                  |           |
| Day / Aircraft | 17a C-1              | <b>TOTAL</b><br>A340-311 |                 |                |     |     |        | 1435             |           |
|                | 17b C-1              | <b>TOTAL</b><br>B737-500 |                 |                |     |     |        | 2715             | 61 - 144  |
|                |                      | A340-642                 |                 |                |     |     |        | 310              | 77 - 151  |
|                |                      | NC                       |                 |                |     |     |        | 100              | 82 - 139  |
|                | 19a C-1              | <b>TOTAL</b><br>A319-111 |                 |                |     |     |        | 189              | -         |
|                |                      | A340-311                 |                 |                |     |     |        | 628              | 94 - 129  |
|                |                      |                          |                 |                |     |     |        | 175              | 63 - 90   |
|                | 19b C-1              | <b>TOTAL</b><br>B767-300 |                 |                |     |     |        | 1647             | 77 - 107  |
|                |                      | CRJ-2                    |                 |                |     |     |        | 319              | 77 - 107  |
|                |                      | A380-841                 |                 |                |     |     |        | 151              | 80 - 95   |
|                |                      |                          |                 |                |     |     |        | 677              | 109 - 240 |
|                | 20 C-1               | <b>TOTAL</b><br>B737-300 |                 |                |     |     |        | 1434             | 90 - 290  |
|                |                      |                          |                 |                |     |     |        | 64               |           |
|                | 16b C-2              | <b>TOTAL</b><br>A340-600 |                 |                |     |     |        | 1511             | 100 - 132 |
| B777           |                      |                          |                 |                |     |     | 128    | 100 - 132        |           |
| A321           |                      |                          |                 |                |     |     | 378    | 120 - 160        |           |
| 17 C-2         | <b>TOTAL</b><br>NC1  |                          |                 |                |     |     | 135    | 70 - 95          |           |
|                | NC2                  |                          |                 |                |     |     | 2904   | -                |           |
|                |                      |                          |                 |                |     |     | 498    | -                |           |
| 24 C-2         | <b>TOTAL</b><br>B777 |                          |                 |                |     |     | 233    | -                |           |
|                |                      |                          |                 |                |     |     | 1380   | 112 - 178        |           |
|                |                      |                          |                 |                |     |     | 371    |                  |           |

Table 2: Classification relative to the six clusters on the Cj2/Cj3 representation of the PCA of all data points for each flight of the two CONCERT campaigns (C-1 in November 2008 and C-2 in September 2011). The legend of the bars represents the relative contribution of data points of individual contrails (blue bars) and also entire flights (black bars) to the 6 individual clusters.

487 The assignment of the data points to the six clusters shown on the expansion diagrams is  
 488 summarized in Table 2. 8 flights (6 additional flights) representing 4426 ASC measurements were  
 489 processed. The lengths of the bars in Table 2 represent the distribution of the data points within the  
 490 different clusters: a) black bars correspond to the fraction of cloud events within a specific flight  
 491 (with extinction coefficient higher than  $0.1 \text{ km}^{-1}$ ) and b) blue bars represent cases of individual  
 492 contrails within the flight. Data points with extinction coefficient lower than  $0.1 \text{ km}^{-1}$  are not shown  
 493 in the table. More than 30% of the data points are located in clusters AC1 and/or CC meaning that  
 494 they correspond to aged contrail and sometimes natural cirrus. Flights clearly performed in well  
 495 visible contrails outside natural cirrus (earlier development stage and/or intensified persistent elder  
 496 contrails) exhibit significant fraction of data points associated to clusters PW, YC1, and YC2  
 497 (young contrails) for both CONCERT-1 and CONCERT-2 campaigns. However, within these  
 498 flights data points are also gathered in cluster AC1 (aged contrails clean) and to a lesser extent in  
 499 cluster AC2 (aged contrails, mostly corresponding to measurements performed during two different  
 500 B777 contrail chasing events).

501 These results are in reasonable agreement with previous conclusions (this subsection) drawn  
 502 for the cluster definitions and associated contrail / ice cloud characteristics. Very young contrails  
 503 have been mostly chased during CONCERT-1 (flights 19a and 19b). Another interesting result is

504 related to flight 17 during CONCERT-2 (flight 17 C-2) where no aircraft information was provided  
505 by ATC. Still ATC data indicate measurements in exhaust plumes and the Falcon flew apparently in  
506 visible contrails ( $\text{ExtPN} > 0.1 \text{ km}^{-1}$ ) which were probably too old for ATC recognition. Our analysis  
507 shows that these data points can mainly be attributed to cluster CC and AC1. This observation  
508 suggests that significantly aged contrails have been sampled. However, crystal formation and  
509 growth processes in contrails and natural cirrus suggest that very old contrails more and more  
510 resemble natural cirrus properties.

511 ATC information on exhaust plume ages was also collected during each chasing. Some  
512 chasings were performed less than 100 s after contrail formation. This is the case for the A340  
513 contrail during flight 19a and for the CRJ-2 contrail during flight 19b of CONCERT-1 and for the  
514 A321 contrail during flight 16b of CONCERT-2. One can notice that the contrail ages are well  
515 correlated to the chosen cluster definitions, revealing that contrail data relative to the A340 are  
516 included in cluster PW and YC2 (young contrails) for more than 90% of the data points, and nearly  
517 63% for the CRJ-2 and 84% for the A321. According to our cluster classification, only 5% of the  
518 data points gathered during these three flights correspond to aged contrail (cluster AC1 and AC2)  
519 categories in contrast to other CONCERT-1 and CONCERT-2 flights (with more than 30% of data  
520 points associated to AC1 and AC2). Even though it is still difficult to associate contrail ages to  
521 measurement points, the “contrail age” ranges agree with the cluster definitions.

## 522 **4 Evolution of contrail properties**

### 523 **4.1 Optical and chemical cluster properties**

524 In the previous section we showed that cloud events can be separated according to their  
525 light-scattering properties. Six clusters were defined based on two flights having a significant  
526 number of data points distributed in each cluster. In this section we present the mean optical,  
527 chemical, and microphysical properties for each cluster. The average properties are calculated for  
528 all data points associated to the 6 individual clusters (all flights, both CONCERT campaigns).  
529 Figures 6a, 6c, and 6d show the normalized frequency distributions of the asymmetry parameter  
530 ( $g_{\text{PN}}$ ), the extinction coefficient ( $\text{ExtPN}$ ), and NO concentrations for the six clusters, respectively.  
531 Figure 6b represents the mean normalized scattering phase functions of each clusters. However, it  
532 should be noted that the number of data points could differ significantly from one cluster to another  
533 (from 141 measurements for Cluster YC1 to 8950 measurements for Cluster AC1).

534 The asymmetry parameter  $g_{\text{PN}}$  statistics shown in Fig. 6a provide the most striking  
535 evidence of the relationship between contrail evolution stage and optical properties. In agreement  
536 with findings of Gayet et al. (2012), aged contrails (cluster AC1 and AC2) and natural cirrus  
537 (cluster CC) correspond to  $g_{\text{PN}}$  values ranging from 0.72 to 0.80. Younger contrails (cluster YC1  
538 and YC2) have values of  $g_{\text{PN}}$  of 0.80 to 0.86. Values of the asymmetry parameter in the primary  
539 wake (cluster PW) are typically above 0.86. These features are a consequence of the time evolution  
540 of ice crystal shapes from quasi-spherical ice particle after exhaust to non-spherical (e.g. column,  
541 needle, bullet, and bullet-rosette type crystals) as the contrail evolves. In the primary wake, the  
542 pressure increases in the descending vortex. This leads to adiabatic heating and subsequent  
543 sublimation of the ice crystals (Lewellen and Lewellen, 2001; Unterstrasser et al., 2016) that can  
544 explain the spherical shapes of ice crystals and thus, the high values of the asymmetry coefficients.



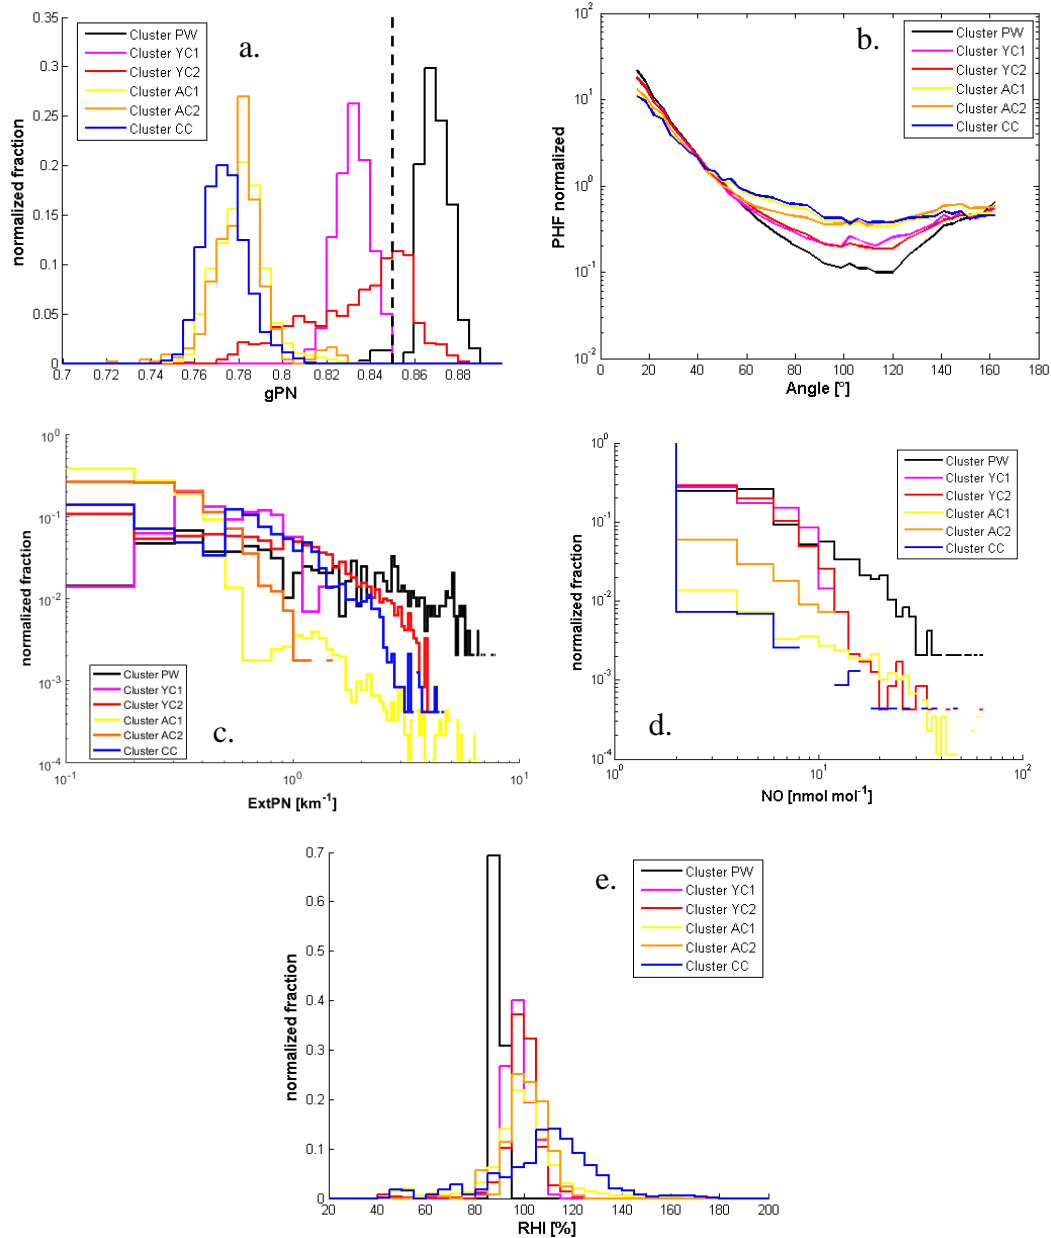

Figure 6: Normalized histograms of a) asymmetry coefficient (dashed line corresponds to a value of 0.85), b) phase function, c) extinction retrieved by Polar Nephelometer, d) NO concentration for all flights, and e) RHI conditions for CONCERT-2 flights.

545 The normalized phase functions are presented in Fig. 6b. Primary wake phase functions  
 546 (cluster PW) are clearly different from the young contrail phase functions (cluster YC1 and YC2),  
 547 which are themselves different from aged contrails (cluster AC1 and AC2) and natural cirrus  
 548 (cluster CC) phase functions. The main difference is observed in the side scattering region (50°-  
 549 140°). This region is related to changes of ice particles shapes and to the fraction of spherical ice  
 550 crystals within the contrails. This behaviour is expected and agrees with the position of clusters PW,  
 551 YC2 and YC1 on the expansion coefficient diagram (Fig. 2). Indeed, the decrease of the  $C_{j2}$   
 552 coefficient is associated to a side scattering enhancement. Therefore, very young contrails are  
 553 composed mainly of spherical ice crystals for which the phase functions indicate a substantial  
 554 scattering at forward angles and much lower scattering at sideward angles. As the contrails evolve,  
 555 these features smooth out leading to phase functions with a featureless flat behaviour at side  
 556 scattering angles. Finally, the averaged normalized phase functions of old contrails and natural

557 cirrus are similar to each other. This also explains that they are difficult to discriminate within the  
558 PCA.

559 The extinction coefficient statistics are presented in Fig. 6c. All the aged contrails (cluster  
560 AC1 and AC2) exhibit extinction coefficients lower than  $2 \text{ km}^{-1}$ . Also 80% of the sampled natural  
561 cirrus (cluster CC) show such low extinction coefficients. For younger contrails (cluster YC1 and  
562 YC2), the extinction coefficients can reach  $5 \text{ km}^{-1}$ . Largest extinction coefficients are found in  
563 primary wake measurements (cluster PW) with values up to  $8 \text{ km}^{-1}$ . Still, the main fraction (more  
564 than 50% of data points) of young contrail data yields extinction coefficients from 0 to  $1 \text{ km}^{-1}$ .

565 Concentrations of chemical species can also be used to characterize contrail/cirrus  
566 properties. The concentration depends strongly on the type of the tracked aircraft. Figure 6d shows  
567 the mean concentration of nitrogen oxide NO for the six individual clusters. Young contrail NO  
568 concentrations (cluster PW, YC1 and YC2) can reach values up to  $10 \text{ nmol mol}^{-1}$  (corresponding to  
569 10% of measurements). For primary wake measurements (PW in black) a higher concentration can  
570 be reached. Approximately 1% of the data have concentrations close to  $60 \text{ nmol mol}^{-1}$  in the  
571 primary wake. In contrast, in aged contrails and in natural cirrus (cluster AC1, AC2 and CC) NO  
572 concentrations higher than  $2 \text{ nmol mol}^{-1}$  do not exceed 1% of cases. Indeed, after exhaust,  
573 concentrations of nitrogen oxide NO and sulphur dioxide SO<sub>2</sub> created by combustion reactions  
574 decrease rapidly due to the dispersion in the upper troposphere and reactions with other molecules.

575 Finally, saturation conditions with respect to ice are presented in Fig. 6e for all clusters. The  
576 predominant measured ambient relative humidity of all clusters is around 95%. Cluster AC1 and  
577 CC (yellow and blue lines respectively) exhibit median RHI values close to 110% and 120%  
578 respectively. These higher values are suitable for the persistence of the contrail and the formation of  
579 cirrus clouds. Supersaturated conditions are not reached for the measurements gathered in the  
580 primary wake cluster (PW). Low humidity values may well occur in primary wakes with non-  
581 persisting contrails.

582 These results highlight that the principal component analysis, based on the ASC  
583 measurements described in Sect. 3, can be used to discriminate contrail phases. Specific optical and  
584 chemical properties can thus be derived for each contrail phase and can be related to their evolution.

## 585 **4.2 Microphysical cluster properties**

586 Microphysical properties are assessed using the combination of FSSP-300 and 2DC  
587 measurements or hydrometeor diameters ranging from  $0.5 \text{ }\mu\text{m}$  to  $800 \text{ }\mu\text{m}$ , but with a gap in the size  
588 range  $17 \text{ }\mu\text{m}$  to  $70 \text{ }\mu\text{m}$ . Figure 7 shows the averaged number particle size distributions (PSD) for  
589 each cluster and for all flights of the study (8 flights from CONCERT-1 and 2). A linear  
590 interpolation in logarithmic space is applied for each PSD to cover the gap from  $17 \text{ }\mu\text{m}$  to  $70 \text{ }\mu\text{m}$ .  
591 Because of this gap, the derived microphysical properties should be considered with caution, but  
592 may be used to check the cluster definitions.

593 PSD measurements in natural cirrus and aged contrails differ significantly depending on the  
594 location of the study, ambient air conditions, measurement methods (instrument limitation (Gayet et  
595 al., 2002), and air speed (Febvre et al., 2009)). Previous studies show that a 3-hours old contrail  
596 cirrus with an effective diameter close to  $20 \text{ }\mu\text{m}$  (Voigt et al., 2017) and number concentration  
597 larger than  $0.1 \text{ cm}^{-3}$  (Schumann et al., 2017) can be composed of ice crystals with sizes up to  $100$   
598  $\mu\text{m}$  (blue dashed line, contrail cirrus figure 7). This differs from the PSD of the natural cirrus  
599 presented by Voigt et al. (2017) (dashed black line), which has an order of magnitude lower particle

600 number concentration. In natural cirrus at mid-latitudes, ice crystals with size up to 1600  $\mu\text{m}$  were  
 601 observed during the ML-CIRRUS campaign (dark dashed line Figure 7, Voigt et al., 2017).

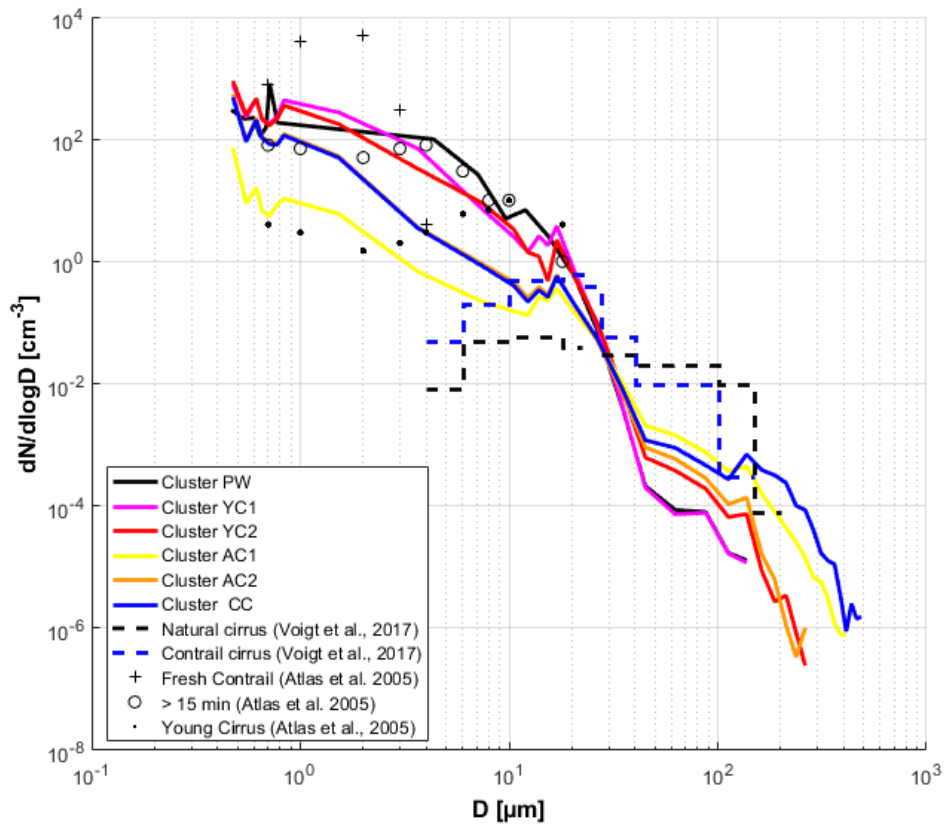

Figure 7: Number particle size distribution for each cluster including all data points of all flights. FSSP-300 measurements from 0.5 to 17  $\mu\text{m}$  and 2DC measurements from 70  $\mu\text{m}$  to 800  $\mu\text{m}$ . The data are linearly interpolated in logarithm space between 17  $\mu\text{m}$  and 70  $\mu\text{m}$ .

602 Figure 7 shows that the mean number PSDs of each cluster are consistent with the cluster  
 603 definition and these previous studies. Indeed, two categories of PSD can be observed. Within the  
 604 FSSP-300 size range, PSD relative to old contrails (cluster AC1 and AC2) and cirrus (cluster CC)  
 605 exhibit number concentration of small ice particles one order of magnitude lower than young  
 606 contrails (clusters YC1 and YC2) and primary wake (cluster PW). Differences in this size range  
 607 should be carefully considered due to uncertainties of the FSSP-300 number concentration  
 608 measurements, which is close to 30% for typical concentrations of  $5\text{cm}^{-3}$  but can reach 75% for  
 609 concentrations of approximately  $0.5\text{cm}^{-3}$  (Gayet et al., 2002). However, we can still discriminate  
 610 primary wake measurements (cluster PW) from secondary wake measurements (clusters YC1 and  
 611 YC2) in the 3 to 10  $\mu\text{m}$  size range. In addition, it is interesting to note that aged contrail  
 612 measurements classified into AC1 cluster present significantly lower ice particle concentrations  
 613 than natural cirrus. The differences observed between the PSD of PW/YC1/YC2 and AC1/AC2/CC  
 614 can be explained by the production of small ice crystals (from 1 to 10  $\mu\text{m}$ ) in fresh exhaust plumes  
 615 followed by rapid dilution during subsequent minutes after the exhaust.

616 Within the 2DC range, the PSDs are also in agreement with the cluster definitions. A higher  
 617 concentration of large ice crystals with diameters around 100  $\mu\text{m}$  and larger are expected for natural  
 618 cirrus (cluster CC) and for significantly well-developed contrails. This is particularly well  
 619 illustrated by the mean PSD from cluster YC1 that displays significantly less particles in the 2DC  
 620 measurements size range than the one corresponding to AC1 and AC2.

| Extinction ( $\text{km}^{-1}$ ) |     | Mean  | std   | Median | percentile 25 | percentile 75 |
|---------------------------------|-----|-------|-------|--------|---------------|---------------|
| cluster                         | PW  | 4,230 | 3,820 | 3,308  | 1,104         | 6,485         |
|                                 | YC1 | 0,720 | 0,410 | 0,680  | 0,351         | 1,026         |
|                                 | YC2 | 2,070 | 2,655 | 1,017  | 0,271         | 2,836         |
|                                 | AC1 | 0,220 | 0,484 | 0,037  | 0,008         | 0,158         |
|                                 | AC2 | 0,110 | 0,161 | 0,054  | 0,004         | 0,126         |
|                                 | CC  | 0,370 | 1,240 | 0,046  | 0,001         | 0,132         |

| IWC ( $\text{mg m}^{-3}$ ) |     | Mean   | std     | Median | percentile 25 | percentile 75 |
|----------------------------|-----|--------|---------|--------|---------------|---------------|
| cluster                    | PW  | 8,173  | 10,586  | 5,573  | 1,665         | 11,363        |
|                            | YC1 | 0,191  | 0,107   | 0,168  | 0,111         | 0,281         |
|                            | YC2 | 4,860  | 8,918   | 1,235  | 0,218         | 6,604         |
|                            | AC1 | 7,072  | 35,765  | 0,124  | 0,000         | 1,151         |
|                            | AC2 | 0,295  | 1,079   | 0,094  | 0,003         | 0,286         |
|                            | CC  | 27,929 | 144,384 | 0,126  | 0,005         | 0,448         |

| NTOTAL ( $\text{cm}^{-3}$ ) |     | Mean    | std     | Median  | percentile 25 | percentile 75 |
|-----------------------------|-----|---------|---------|---------|---------------|---------------|
| cluster                     | PW  | 172,965 | 114,497 | 152,398 | 95,564        | 223,374       |
|                             | YC1 | 409,726 | 205,625 | 405,127 | 230,907       | 603,187       |
|                             | YC2 | 188,139 | 199,736 | 125,344 | 52,584        | 236,100       |
|                             | AC1 | 8,206   | 6,550   | 1,696   | 0,966         | 3,363         |
|                             | AC2 | 28,883  | 43,758  | 9,176   | 2,954         | 42,626        |
|                             | CC  | 5,092   | 24,453  | 3,444   | 1,467         | 6,511         |

Table 3: Optical and microphysical properties for each cluster according interpolated particle size distributions from FSSP-300 and 2DC measurements.

621 Table 3 presents ice water content (IWC, in  $\text{mg m}^{-3}$ ) and total number of ice crystals  
622 (NTOTAL, in  $\text{cm}^{-3}$ ) derived from the measured PSD for each cluster. The extinction coefficient (in  
623  $\text{km}^{-1}$ ) obtained from the PN measurements is also displayed. Despite the large uncertainties  
624 associated to both instruments and the interpolation between 17  $\mu\text{m}$  and 70  $\mu\text{m}$  diameters, these  
625 results again show that each cluster can be connected to a specific contrail phase, and their  
626 properties can be compared to previous studies.

627 In terms of cluster mean values, the microphysical and optical properties of cluster PW agree with  
628 the cloud properties expected in the primary wakes. The extinction coefficient has a mean value of  
629  $4.23 \text{ km}^{-1}$ , IWC is close to  $28 \text{ mg m}^{-3}$ , and the number concentration yields a typical value of 173  
630 particles  $\text{cm}^{-3}$ . These properties are in agreement with previous measurement reported by Gayet et  
631 al. (2012) with particle number concentrations close to  $200 \text{ cm}^{-3}$  for contrails less than 60 s after  
632 their formation. Their work also reports extinction coefficient around  $7 \text{ km}^{-1}$  presenting the highest  
633 values of the contrail life time.

634 Young (clusters YC1 and YC2) and aged contrails (clusters AC1 and AC2) exhibit  
635 distinctive differences in their extinction coefficients and their concentrations of ice particles.  
636 Higher extinction coefficients and ice number concentration, more than  $0.7 \text{ km}^{-1}$  and  $170 \text{ cm}^{-3}$ ,  
637 respectively, characterize young contrails compared to aged contrails, with less than  $0.4 \text{ km}^{-1}$  and  
638 around  $10 \text{ particles cm}^{-3}$ , respectively. The ice number concentrations are in agreement with  
639 previous results with values between  $200$  and  $100 \text{ cm}^{-3}$  for contrail ages between 60 s and 3 min,  
640 and around  $5 \text{ cm}^{-3}$  for contrail ages around 10 min (Goodman et al., 1998 ; Lawson et al., 1998 ;  
641 Schröder et al., 2000 ; Schäuble et al., 2009 ; Gayet et al., 2012 ; Voigt et al., 2017). The IWC  
642 values differ significantly between clusters YC1 and YC2 which may be due to a lower number of  
643 large particles with diameter higher than  $20 \mu\text{m}$  in YC1 than in YC2. Cluster CC corresponds to  
644 natural cirrus clouds which experienced strongly variable spreading and ice growth. Indeed, the

645 IWC is significantly higher ( $28 \text{ mg m}^{-3}$ ) within this cluster than in other clusters. However, the ice  
646 number concentration and the extinction coefficient are higher than in previous studies, with values  
647 around  $0.1 \text{ cm}^{-3}$  and  $0.023 \text{ km}^{-1}$  respectively. Besides to interpolation between the FSSP-300 and  
648 the 2DC measurements, the assumed shape (spherical or aspherical), and shattering of large ice  
649 particles in cirrus and aged contrails can also have a significant effect on the measurement of optical  
650 and microphysical properties (Gayet et al., 2012).

## 651 **Conclusions**

652 In this study, a new form of statistical analysis of contrail to cirrus evolution is presented  
653 based on two intensive contrail measurement campaigns, CONCERT-1 and CONCERT-2. The data  
654 are used to study optical and microphysical properties of contrails during their evolution from  
655 young contrails to contrail-cirrus clouds, and of ambient natural cirrus clouds. The combination of  
656 optical, microphysical, chemical airborne measurements with aircraft chasing information from  
657 ATC was used to provide an extended view of cloud properties.

658 A Principal Component Analysis (PCA) methodology was applied to the measured Polar  
659 Nephelometer scattering phase function data to facilitate the discrimination of cloud properties of  
660 different contrail phases. The PCA results were derived first for two reference flights that sampled  
661 contrails and cirrus in various development stages, including the primary wake, the young  
662 secondary wake, old contrails (few minutes after formation) and natural cirrus. For these flights, the  
663 PCA clearly demonstrates its potential to discriminate different groups of clouds, justifying the use  
664 of these two flights as a benchmark. Thereafter, the scattering phase functions measured during  
665 other CONCERT flights were projected into the space of principal components obtained from the  
666 two reference flights. Individual data points were assigned to the predefined cluster with minimum  
667 Mahalanobis distances. From the entire data set, the cloud properties in the various contrail  
668 development stages can be analysed separately.

669 The analysis demonstrates that the clearest separation between clusters is derived from  
670 particle shape, which impacts the scattering phase function and the derived asymmetry parameter  
671 gPN. The asymmetry parameter clearly separates young contrails (gPN of 0.72 to 0.80) from  
672 contrail/cirrus with gPN ranging from 0.80 to 0.88. Since the exact contrail age was not always  
673 known, young and aged contrails are classified also by their optical and chemical properties. The  
674 measured NO concentrations are also useful to distinguish natural cirrus from old contrails.

675 Despite the large size gap between the size ranges of the two instruments used, particle size  
676 spectra and related mean values of the ice particle number concentration, extinction and ice water  
677 content have been determined for each cluster. The various clusters clearly show different size  
678 distributions. In good agreement with previous findings on optical and chemical properties, we find  
679 that young contrails have more than a factor of ten higher number concentrations of small ice  
680 crystals (with diameters lower than  $20 \mu\text{m}$ ) than aged contrails and natural cirrus. On the other  
681 hand, aged contrails and natural cirrus contain larger ice crystals, with diameters larger than  $75 \mu\text{m}$ .  
682 The optical and microphysical properties of the aged contrail cirrus are often similar to those found  
683 in the ambient “natural” cirrus clouds. The results show that the PCA method allows to identify and  
684 discriminate different contrail growth stages and to provide an independent method for the  
685 characterization of the evolution of contrail properties.

686 In agreement with Shcherbakov et al. (2016), who characterised volcanic and cirrus using  
687 optical measurements, the PCA method has been clearly shown here to be suitable for contrail  
688 studies. The additional use of microphysical and chemical measurements can be added to the PCA  
689 method in order to improve the selection of contrail phases. Different ranges of extinction or

690 asymmetric coefficients could be also used for PCA analyses in this perspective. However,  
691 additional parameters should be carefully selected to limit the bias introduced by the limitations of  
692 the probes and the optimal selection may vary from one measurement campaign to another.

693 Accurate modelling of cirrus or contrails' single scattering properties is required for the  
694 interpretation of remote sensing measurements. Therefore, measurements of the optical  
695 characteristics of ice crystals in natural conditions are still needed for validation of numerical  
696 techniques and for the determination of free parameters in light scattering models. In this context,  
697 the results from the PCA could be used to develop representative parameterizations of the scattering  
698 properties and the ice crystals' shapes and sizes observed in the visible wavelength range.

## 699 **Acknowledgments**

700 We thank for financial support by the Helmholtz Association under contract VH-NG-309 and  
701 W2/W3-60. Part of this work was funded by DFG SPP HALO 1294 contract VO1504/4-1, and by  
702 the DLR project Eco2Fly in ML-CIRRUS-cirrus special issue. We thank Lufthansa, the DLR flight  
703 department and the Deutsche Flugsicherung for excellent support during the campaign. The in-situ  
704 data can be found in the HALO-database (<https://halo-db.pa.op.dlr.de/>).

## 705 **References**

- 706 Baran, A.J., Gayet, J.-F., and Shcherbakov, V.: On the interpretation of an unusual in-situ measured  
707 ice crystal scattering phase function. *Atmospheric Chemistry and Physics* 12, 9355–9364, 2012.  
708
- 709 Baumgardner, D., Dye, J.E., Gandrud, B.W., and Knollenberg, R.G.: Interpretation of  
710 measurements made by the forward scattering spectrometer probe (FSSP-300) during the  
711 Airborne Arctic Stratospheric Expedition. *Journal of Geophysical Research* 97, 8035–8046, 1992.  
712
- 713 Borrmann, S., Luo, B., and Mishchenko, M.: Application of the T-Matrix Method to the  
714 Measurement of Aspherical (Ellipsoidal) Particles with Forward Scattering Optical Particle  
715 Counters. *Journal of Aerosol Science* 31, no. 7 (2000): 789–799, 2000.  
716
- 717 Burkhardt, U., Kärcher, B., and Schumann, U.: Global modeling of the contrail and contrail cirrus  
718 climate impact. *Bulletin of the American Meteorological Society* 91, 479–484, 2010.  
719
- 720 Burkhardt, U. and Kärcher, B.: Global radiative forcing from contrail cirrus. *Nature Climate*  
721 *Change*, 1(1), 54–58, 2011.  
722
- 723 Carleton, A.M., Silva, A.D., Aghazarian, M.S., Bernhardt, J., Travis, D.J., and Allard, J.: Mid-  
724 season climate diagnostics of jet contrail “outbreaks” and implications for eastern US sky-cover  
725 trends. *Climate Research*, 56, 209–230, 2013.  
726
- 727 Chen, C.-C. and Gettelman, A.: Simulated 2050 aviation radiative forcing from contrails and  
728 aerosols. *Atmospheric Chemistry and Physics*, 16(11), 7317–7333, 2016.  
729
- 730 Duda, D. P., Minnis, P., Khlopenkov, K., Chee, T.L., and Boeke, R.: Estimation of 2006 Northern  
731 Hemisphere Contrail Coverage Using MODIS Data. *Geophysical Research Letters*, 40, 612-617,  
732 doi:10.1002/grl.50097, 2013.  
733

734 Febvre, G., Gayet, J.-F., Minikin, A., Schlager, H., Shcherbakov, V., Jourdan, O., Busen, R., Fiebig,  
735 M., Kärcher, B., and Schumann, U.: On optical and microphysical characteristics of contrails and  
736 cirrus. *Journal of Geophysical Research: Atmospheres* (1984–2012) 114, 2009.  
737

738 Frömming, C., Ponater, M., Dahlmann, K., Grewe, V., Lee, D.S., and Sausen, R.: Aviation-induced  
739 radiative forcing and surface temperature change in dependency of the emission altitude. *Journal*  
740 *of Geophysical Research: Atmospheres* (1984–2012) 117, 2012.  
741

742 Gayet, J.F., Crépel, O., Fournol, J.F., and Oshchepkov, S.: A new airborne Polar Nephelometer for  
743 the measurements of optical and microphysical cloud properties. Part I: Theoretical design. In  
744 *Annales Geophysicae*, pp. 451–459, 1997.  
745

746 Gayet, J.-F., Auriol, F., Minikin, A., Ström, J., Seifert, M., Krejci, R., Petzold, A., Febvre, G., and  
747 Schumann, U.: Quantitative Measurement of the Microphysical and Optical Properties of Cirrus  
748 Clouds with Four Different in Situ Probes: Evidence of Small Ice Crystals. *Geophysical Research*  
749 *Letters* 29, no. 24: 2230. doi:10.1029/2001GL014342, 2002.  
750

751 Gayet, J.-F., Ovarlez J., Shcherbakov, V., Ström, J., Schumann, U., Minikin, A., Auriol, F., Petzold,  
752 A., and Monier M.: Cirrus Cloud Microphysical and Optical Properties at Southern and Northern  
753 Midlatitudes during the INCA Experiment. *Journal of Geophysical Research: Atmospheres* 109,  
754 no. D20 : D20206. doi:10.1029/2004JD004803, 2004.  
755

756 Gayet, J.-F., Shcherbakov, V., Voigt, C., Schumann, U., Schäuble, D., Jeßberger, P., Petzold, A.,  
757 Minikin, A., Schlager, H., Dubovik, O., and Lapyonok, T.: The evolution of microphysical and  
758 optical properties of an A380 contrail in the vortex phase. *Atmospheric Chemistry and Physics*.  
759 12, 6629–6643, 2012.  
760

761 Garrett, T.J., Gerber, H., Baumgardner, D.G., Twohy, C.H., and Weinstock, E.M.: Small, highly  
762 reflective ice crystals in low-latitude cirrus. *Geophysical Research Letters* 30, 2132, 2003.  
763

764 Gettelman, A., and Chen, C.: The climate impact of aviation aerosols. *Geophysical Research*  
765 *Letters*, 40, 2785–2789, doi:10.1002/grl.50520, 2013.  
766

767 Gierens, K. and Dilger, F.: A climatology of formation conditions for aerodynamic contrails,  
768 *Atmospheric Chemistry and Physics*, 13, 10847-10857, doi:10.5194/acp-13-10847-2013, 2013.  
769

770 Graf, K., Schumann, U., Mannstein, H., and Mayer, B.: Aviation induced diurnal North Atlantic  
771 cirrus cover cycle. *Geophysical Research Letters* 39, L16804, doi:10.1029/2012GL052590, 2012.  
772

773 Goodman, J., Pueschel, R.F., Jensen, E.J., Verma, S., Ferry, G.V., Howard, S.D., Kinne, S.A., and  
774 Baumgardner, D.: Shape and size of contrails ice particles. *Geophysical Research Letters* 25,  
775 1327–1330, 1998.  
776

777 Heller, R., Voigt, C., Beaton, S., Dörnbrack, A., Kaufmann, S., Schlager, H., Wagner, J., Young,  
778 K., and Rapp, M.: Mountain waves modulate the water vapor distribution in the UTLS,  
779 *Atmospheric Chemistry and Physics, Discussion*, doi:10.5194/acp-2017-334, in review.  
780

781 Heymsfield, A.J., and Parrish, J.L.: A computational technique for increasing the effective sampling  
782 volume of the PMS two-dimensional particle size spectrometer. *Journal of Applied Meteorology*  
783 17, 1566–1572, 1978.

784 Heymsfield, A., Baumgardner, D., DeMott, P., Forster, P., Gierens, K., and Kärcher, B.: Contrail  
785 Microphysics. *Bulletin of the American Meteorological Society* 91, 465–472, 2010.  
786

787 Irvine, E.A., Hoskins, B.J., and Shine, K.P.: The dependence of contrail formation on the weather  
788 pattern and altitude in the North Atlantic. *Geophysical Research Letters* 39, L12802,  
789 doi:10.1029/2012GL051909, 2012.  
790

791 Järvinen, E., Schnaiter, M., Mioche, G., Jourdan, O., Shcherbakov, V.N., Costa, A., Afchine, A.,  
792 Krämer, M., Heidelberg, F., Jurkat, T., Voigt, C., Schlager, H., Nichman, L., Gallagher, M.,  
793 Hirst, E., Schmitt, C., Bansemer, A., Heymsfield, A., Lawson, P., Tricoli, U., Pfeilsticker, K.,  
794 Vochezer, P., Möhler, O., and Leisner, T.: Quasi-spherical Ice in Convective Clouds, *Journal of*  
795 *Atmospheric Sciences*, doi:10.1175/JAS-D-15-0365.1, 2016.  
796

797 Jansen, J. and Heymsfield, A. J.: Microphysics of aerodynamic contrail formation processes,  
798 *Journal of Atmospheric Sciences*, 72(9), 3293–3308, 2015.  
799

800 Jeßberger, P., Voigt, C., Schumann, U., Sölch, I., Schlager, H., Kaufmann, S., Petzold, A.,  
801 Schäuble, D., and Gayet, J.F.: Aircraft type influence on contrail properties, *Atmospheric*  
802 *Chemistry and Physics*, 13, 11965–11984, doi:10.5194/acp-13-11965-2013, 2013.  
803

804 Jourdan, O., Oshchepkov, S., Gayet, J.-F., Shcherbakov, V., and Isaka, H.: Statistical analysis of  
805 cloud light scattering and microphysical properties obtained from airborne measurements. *Journal*  
806 *of Geophysical Research* 108, 4155, 2003.  
807

808 Jourdan, O., Mioche, G., Garrett, T.J., Schwarzenböck, A., Vidot, J., Xie, Y., Shcherbakov, V.,  
809 Yang, P., and Gayet, J.-F.: Coupling of the microphysical and optical properties of an Arctic  
810 nimbostratus cloud during the ASTAR 2004 experiment: Implications for light-scattering  
811 modeling. *Journal of Geophysical Research: Atmospheres* (1984–2012) 115, 2010.  
812

813 Jurkat, T., Voigt, C., Arnold, F., Schlager, H., Aufmhoff, H., Schmale, J., Schneider, J.,  
814 Lichtenstern, M., and Dörnbrack, A.: Airborne stratospheric ITCIMS-measurements of SO<sub>2</sub>, HCl,  
815 and HNO<sub>3</sub> in the aged plume of volcano Kasatochi, *Journal of Geophysical Research*, 115,  
816 D00L17, doi:10.1029/2010JD013890, 2010.  
817

818 Jurkat, T., Voigt, C., Arnold, F., Schlager, H., Kleffmann, J., Aufmhoff, H., Schäuble, D., Schäfer,  
819 M., and Schumann, U.: Measurements of HONO, NO, NO<sub>y</sub> and SO<sub>2</sub> in aircraft exhaust plumes  
820 at cruise, *Geophysical Research Letters*, 38, L10807, doi:10.1029/2011GL046884, 2011.  
821

822 Jurkat, T., Kaufmann, S., Voigt, C., Schäuble, D., Jeßberger, P., and Ziereis, H.: The airborne mass  
823 spectrometer AIMS – Part 2: Measurements of trace gases with stratospheric or tropospheric  
824 origin in the UTLS, *Atmospheric Measurement Technics*, 9, 1907–1923, doi:10.5194/amt-9-  
825 1907-2016, 2016.  
826

827 Kärcher, B., and Voigt, C.: Formation of nitric acid/water ice particles in cirrus clouds, *Geophysical*  
828 *Research Letters*, 33, L08806, doi:10.1029/2006GL025927, 2006.  
829

830 Kärcher, B., and Voigt, C.: Susceptibility of contrail ice crystal numbers to aircraft soot particle  
831 emissions, *Geophysical Research Letters*, 44, 8037–8046, doi:10.1002/2017GL074949, 2017.  
832



833 Kärcher, B., and Yu, F.: Role of aircraft soot emissions in contrail formation. *Geophysical Research*  
834 *Letters*, 36, L01804, doi:10.1029/2008GL036649, 2009.

835

836 Kaufmann, S., Voigt, C., Jeßberger, P., Jurkat, T., Schlager, H., Schwarzenboeck, A., Klingebiel,  
837 M., and Thornberry, T.: In situ measurements of ice saturation in young contrails, *Geophysical*  
838 *Research Letters*, 41, doi:10.1002/2013GL058276, 2014.

839

840 Kaufmann, S., Voigt, C., Jurkat, T., Thornberry, T., Fahey, D. W., Gao, R.-S., Schlage, R.,  
841 Schäuble, D., and Zöger, M.: The airborne mass spectrometer AIMS – Part 1: AIMS-H<sub>2</sub>O for  
842 UTLS water vapor measurements, *Atmospheric Measurement Technics*, 9, 939-953,  
843 doi:10.5194/amt-9-939-2016, 2016.

844

845 Kübbeler, M., Hildebrandt, M., Meyer, J., Schiller, C., Hamburger, Th., Jurkat, T., Minikin, A.,  
846 Petzold, A., Rautenhaus, M., Schlager, H., Schumann, U., Voigt, C., Spichtinger, P., Gayet, J.-F.,  
847 Gourbeyre, C., and Krämer, M.: Thin and subvisible cirrus and contrails in a subsaturated  
848 environment, *Atmospheric Chemistry and Physics*, 11, 5853-5865, doi:10.5194/acp-11-5853-  
849 2011, 2011.

850

851 Lawson, R. Paul, Andrew J. Heymsfield, Steven M. Aulenbach, et Tara L. Jensen. « Shapes, sizes  
852 and light scattering properties of ice crystals in cirrus and a persistent contrail during SUCCESS  
853 ». *Geophysical research letters* 25, no 9: 1331–1334, 1998.

854

855 Lawson, R.P., O'Connor, D., Zmarzly, P., Weaver, K., Baker, B., Mo, Q., and Jonsson, H.: The 2D-  
856 S (stereo) probe: Design and preliminary tests of a new airborne, high-speed, high-resolution  
857 particle imaging probe. *Journal of Atmospheric and Oceanic Technology* 23, 1462–1477, 2006.

858

859 Lee, D.S., Pitari, G., Grewe, V., Gierens, K., Penner, J.E., Petzold, A., Prather, M.J., Schumann, U.,  
860 Bais, A., and Berntsen, T.: Transport impacts on atmosphere and climate: Aviation. *Atmospheric*  
861 *Environment* 44, 4678–4734, 2010.

862

863 Legendre, P., and Legendre, L.: *Numerical Ecology*, 2nd English ed., 853 pp., Elsevier Science,  
864 New York, 1998.

865

866 De León, R.R., Krämer, M., Lee, D.S., and Thelen, J.C.: Sensitivity of radiative properties of  
867 persistent contrails to the ice water path. *Atmospheric Chemistry and Physics*. 12, 7893–7901,  
868 2012.

869

870 Lewellen, D.C.: Analytic solutions for evolving size distributions of spherical crystals or droplets  
871 undergoing diffusional growth in different regimes. *Journal of the Atmospheric Sciences* 69,  
872 417–434, 2012.

873

874 Lewellen, D.C., and Lewellen, W.S.: The effects of aircraft wake dynamics on contrail  
875 development. *Journal of the Atmospheric Sciences* 58, 390–406, 2001.

876

877 Liou, K.N., Takano, Y., Yue, Q., and Yang, P.: On the radiative forcing of contrail cirrus  
878 contaminated by black carbon. *Geophysical Research Letters*, 40, 778–784,  
879 doi:10.1002/grl.50110, 2013.

880

881 De Maesschalck, R., Jouan-Rimbaud, D., and Massart, D.L.: The Mahalanobis Distance.  
882 Chemometrics and Intelligent Laboratory Systems 50, no. 1: 1–18. doi:10.1016/S0169-  
883 7439(99)00047-7, 2010.  
884

885 Meyer, J., Rolf, C., Schiller, C., Rohs, S., Spelten, N., Afchine, A., Zöger, M., Sitnikov, N.,  
886 Thornberry, T. D., Rollins, A. W., Bozóki, Z., Tátrai, D., Ebert, V., Kühnreich, B., Mackrodt, P.,  
887 Möhler, O., Saathoff, H., Rosenlof, K. H., and Krämer, M.: Two decades of water vapor  
888 measurements with the FISH fluorescence hygrometer: a review, Atmospheric Chemistry and  
889 Physics, 15, 8521–8538, doi:10.5194/acp-15-8521-2015, 2015.  
890

891 Mishchenko, M.I., Travis, L.D., Kahn, R.A., and West, R.A.: Modeling phase functions for dustlike  
892 tropospheric aerosols using a shape mixture of randomly oriented polydisperse spheroids. Journal  
893 of Geophysical Research 102, 16831–16, 1997.  
894

895 Moore, R. H., Thornhill, K. L., Weinzierl, B., Sauer, D., D’Ascoli, E., Kim, J., Lichtenstern, M.,  
896 Scheibe, M., Beaton, B., Beyersdorf, A. J., Barrick, J., Bulzan, D., Corr, C. A., Crosbie, E.,  
897 Jurkat, T., Martin, R., Riddick, D., Shook, M., Slover, G., Voigt, C., White, R., Winstead, E.,  
898 Yasky, R., Ziemba, L. D., Brown, A., Schlager, H., and Anderson, B. E.: Biofuel blending  
899 reduces particle emissions from aircraft engines at cruise conditions, Nature, 543, 411-415,  
900 10.1038/nature21420, 2017.  
901

902 Schäuble, D., Voigt, C., Kärcher, B., Stock, P., Schlager, H., Krämer, M., Schiller, C., Bauer, R.,  
903 Spelten, N., De Reus, M., Szakáll, M., Borrmann, S., Weers, U., and Peter T.: Airborne  
904 measurements of the nitric acid partitioning in persistent contrails, Atmospheric Chemistry and  
905 Physics, 9, 8189-8197, 2009.  
906

907 Schlager, H., Konopka, P., Schulte, P., Schumann, U., Ziereis, H., Arnold, F., Klemm, M., Hagen,  
908 D.E., Whitefield, P.D., and Ovarlez, J.: In situ observations of air traffic emission signatures in  
909 the North Atlantic flight corridor. Journal of Geophysical Research 102, 10739–10, 1997.  
910

911 Schröder, F., Kärcher, B., Durore, C., Ström, J., Petzold, A., Gayet, J.-F., Strauss, B., Wendling,  
912 P., and Borrmann, S.: On the Transition of Contrails into Cirrus Clouds. Journal of the  
913 Atmospheric Sciences 57, 464–480, 2000.  
914

915 Schumann, U.: On conditions for contrail formation from aircraft exhausts. Meteorologische  
916 Zeitschrift, 5, 4–23, 1996.  
917

918 Schumann, U., and Heymsfield, A.: On the lifecycle of individual contrails and contrail cirrus,  
919 Meteorological Monographs, 58, 3.1-3.24, doi: 10.1175/AMSMONOGRAPHS-D-16-0005.1,  
920 2017.  
921

922 Schumann, U., Jeßberger, P., and Voigt, C.: Contrail ice particles in aircraft wakes and their  
923 climatic importance, Geophysical Research Letters, 40, 2867-2872, doi: 10.1002/grl.50539, 2013.  
924

925 Schumann, U., Mayer, B., Gierens, K., Unterstrasser, S., Jessberger, P., Petzold, A., Voigt, C., and  
926 Gayet, J.-F.: Effective Radius of Ice Particles in Cirrus and Contrails. Journal of the Atmospheric  
927 Sciences, 68, 300–321, 2011.  
928

- 929 Schumann, U., Penner, J.E., Chen, Y., Zhou, C., and Graf, K.: Dehydration effects from contrails in  
930 a coupled contrail-climate model, *Atmospheric Chemistry and Physics*, 15, 11179-11199, doi:  
931 10.5194/acp-15-11179-2015, 2015.
- 932
- 933 Schumann, U., Kiemle, C., Schlager, H., Weigel, R., Borrmann, S., D'Amato, F., Krämer, M.,  
934 Matthey, R., Protat, A., Voigt, C., and Volk, C. M.: Long-lived contrails and convective cirrus  
935 above the tropical tropopause, *Atmospheric Chemistry and Physics*, 17, 2311-2346,  
936 doi:10.5194/acp-17-2311-2017, 2017a.
- 937
- 938 Schumann, U., Baumann, R., Baumgardner, D., Bedka, S. T., Duda, D. P., Freudenthaler, V.,  
939 Gayet, J.-F., Heymsfield, A. J., Minnis, P., Quante, M., Raschke, E., Schlager, H., Vázquez-  
940 Navarro, M., Voigt, C. and Wang, Z.: Properties of individual contrails: a compilation of  
941 observations and some comparisons, *Atmospheric Chemistry and Physics*, 17(1), 403–438,  
942 doi:10.5194/acp-17-403-2017, 2017b.
- 943
- 944 Seber, G. A. F.: Multivariate analysis of variance and covariance. *Multivariate observations*, 433–  
945 495, 1984.
- 946
- 947 Shcherbakov, V., Jourdan, O., Voigt, C., Gayet, J.F., Chauvigne, A., Schwarzenboeck, A., Minikin,  
948 A., Klingebiel, M., Weigel, R., Borrmann, S., Jurkat, T., Kaufmann, S., Schlager, R., Gourbeyre,  
949 C., Febvre, G., Lapyonok, T., Frey, W., Molleker, S., and Weinzierl, B.: Porous Aerosol in  
950 Degassing Plumes of Mt. Etna and Mt. Stromboli. *Atmospheric Chemistry Physics* 16, no. 18:  
951 11883–97. doi:10.5194/acp-16-11883-2016, 2016.
- 952
- 953 Spath, Helmuth. *The Cluster Dissection and Analysis Theory FORTRAN Programs Examples*.  
954 Prentice-Hall, Inc., 1985.
- 955
- 956 Sussmann, R., and Gierens, K.M.: Lidar and numerical studies on the different evolution of vortex  
957 pair and secondary wake in young contrails. *Journal of Geophysical Research: Atmospheres* 104,  
958 2131–2142, 1999.
- 959
- 960 Sussmann, R., and Gierens, K.M.: Differences in early contrail evolution of two-engine versus four-  
961 engine aircraft: Lidar measurements and numerical simulations. *Journal of Geophysical*  
962 *Research: Atmospheres* 106, 4899–4911, 2001.
- 963
- 964 Vazquez-Navarro, M., Mannstein, H. and Kox, S.: Contrail life cycle and properties from 1 year of  
965 MSG/SEVIRI rapid-scan images, *Atmospheric Chemistry and Physics*, 15(15), 8739–8749, 2015.
- 966
- 967 Voigt C., Schlager, H., Ziereis, H., Kärcher, B., Luo, B.P., Schiller, C., Krämer, M., Popp, P.J., Irie,  
968 H., and Kondo, Y.: Nitric acid in cirrus clouds, *Geophysical Research Letters*, 33, L05803,  
969 doi:10.1029/2005GL025159, 2006.
- 970
- 971 Voigt, C., Schumann, U., Jurkat, T., Schäuble, D., Schlager, H., Petzold, A., Gayet, J.-F., Krämer,  
972 M., Schneider, J., Borrmann, S., Schmale, J., Jessberger, P., Hamburger, T., Lichtenstern, M.,  
973 Scheibe, M., Gourbeyre, C., Meyer, J., Kübbeler, M., Frey, W., Kalesse, H., Butler, T.,  
974 Lawrence, M.G., Holzäpfel, F., Arnold, F., Wendisch, M., Döpelheuer, A., Gottschaldt, K.,  
975 Baumann, R., Zöger, M., Sölch, I., Rautenhaus, M., and Dörnbrack, A.: In-situ observations of  
976 young contrails - Overview and selected case studies from the CONCERT campaign,  
977 *Atmospheric Chemistry and Physics*, 10, 9039–9056, doi:10.5194/acp-10-9039-2010, 2010.
- 978

979 Voigt, C., Schumann, U., Jessberger, P., Jurkat, T., Petzold, A., Gayet, J.-F., Krämer, M.,  
980 Thornberry, T., and Fahey, D.: Extinction and optical depth of contrails, *Geophysical Research*  
981 *Letters*, 38, L11806, doi:10.1029/2011GL04718, 2011.  
982

983 Voigt, C., Jessberger, P., Jurkat, T., Kaufmann, S., Baumann, R., Schlager, H., Bobrowski, N.,  
984 Giuffrida, G., and Salerno, G.: Evolution of CO<sub>2</sub>, SO<sub>2</sub>, HCl, and HNO<sub>3</sub> in the Volcanic Plumes  
985 from Etna. *Geophysical Research Letters*, 41, 6, 2196-2203. doi:10.1002/2013GL058974, 2014.  
986

987 Voigt, C., Schumann, U., Minikin, A., Abdelmonem, A., Afchine, A., Borrmann, S., Boettcher, M.,  
988 Buchholz, B., Bugliaro, L., Costa, A., Curtius, J., Dollner, M., Dörnbrack, A., Dreiling, V., Ebert,  
989 V., Ehrlich, A., Fix, A., Forster, L., Frank, F., Fütterer, D., Giez, A., Graf, K., Groß, J.-U., Groß,  
990 S., Heimerl, K., Heinold, B., Hüneke, T., Järvinen, E., Jurkat, T., Kaufmann, S., Kenntner, M.,  
991 Klingebiel, M., Klimach, T., Kohl, R., Krämer, M., Krisna, T. C., Luebke, A., Mayer, B., Mertes,  
992 S., Molleker, S., Petzold, A., Pfeilsticker, K., Port, M., Rapp, M., Reutter, P., Rolf, C., Rose, D.,  
993 Sauer, D., Schäfler, A., Schlage, R., Schnaiter, M., Schneider, J., Spelten, N., Spichtinger, P.,  
994 Stock, P., Walser, A., Weigel, R., Weinzierl, B., Wendisch, M., Werner, F., Wernli, H., Wirth,  
995 M., Zahn, A., Ziereis, H., and Zöger, M.: ML-CIRRUS - The airborne experiment on natural  
996 cirrus and contrail cirrus with the high-altitude long-range research aircraft HALO, *Bulletin of*  
997 *the American Meteorological Society*, doi: 10.1175/BAMS-D-15-00213, 2017.  
998

999 Xie, Y., Yang, P., Gao, B.-C., Kattawar, G.W., and Mishchenko, M.I.: Effect of ice crystal shape  
1000 and effective size on snow bidirectional reflectance. *Journal of Quantitative Spectroscopy and*  
1001 *Radiative Transfer* 100, 457–469, 2006.  
1002

1003 Xie, Y., Yang, P., Kattawar, G.W., Minnis, P., and Hu, Y.X.: Effect of the inhomogeneity of ice  
1004 crystals on retrieving ice cloud optical thickness and effective particle size. *Journal of*  
1005 *Geophysical Research: Atmospheres* (1984–2012) 114, 2009.  
1006

1007 Yang, P., Hong, G., Dessler, A.E., Ou, S.S., Liou, K.-N., and Minnis, P.: Contrails and induced  
1008 cirrus: Optics and radiation. *Bulletin of the American Meteorological Society* 91, 473–478, 2010.  
1009

1010 Ziereis, H., Schlager, H., Schulte, P., Velthoven, P. van, and Slemr, F.: Distributions of NO, NO<sub>x</sub>,  
1011 and NO<sub>y</sub> in the upper troposphere and lower stratosphere between 28 and 61 N during  
1012 POLINAT 2. *Journal of Geophysical Research: Atmospheres* (1984–2012) 105, 3653–3664,  
1013 2000.  
1014

1015 Zöger, M., Afchine, A., Eicke, N., Gerhards, M-T., Klein, E., McKenna, D.S., Mörschel, U.,  
1016 Schmidt, U., Tan, V., Tuitjer, F., Woyke, T., Schiller, C. : Fast in situ stratospheric hygrometers:  
1017 A new family of balloon-borne and airborne Lyman alpha photofragment fluorescence  
1018 hygrometers. *Journal of Geophysical Research: Atmospheres*, 104, 1807-1816, 1999.  
1019
